# Supplementary material for: Combining multi-dimensional data to identify key genes and pathways in gastric cancer
Source: PeerJ. 2017 Jun 6;5:e3385. doi: 10.7717/peerj.3385 (PMC5463969; doi:10.7717/peerj.3385)
Supplement: Table S1 [file peerj-05-3385-s001.xlsx]

## Sheet: Sheet1
	Table S1. TCGA sample IDs of 272 gastric cancer patients.
	Patient ID	Gene	miRNA	methylation	copy number
	TCGA-B7-5816	0	0		0
	TCGA-B7-5818	0	0		0
	TCGA-BR-4187	0	0	1	0
	TCGA-BR-4191	0	0	1	0
	TCGA-BR-4201	0	0	1	0
	TCGA-BR-4253	0	0	1	0
	TCGA-BR-4255	0	0	1	0
	TCGA-BR-4256	0	0	1	0
	TCGA-BR-4257	0	0	1	0
	TCGA-BR-4267	0	0	1	0
	TCGA-BR-4279	0	0	1	0
	TCGA-BR-4280	0	0	1	0
	TCGA-BR-4292	0	0	1	0
	TCGA-BR-4294	0	0	1	0
	TCGA-BR-4357	0	0	1	0
	TCGA-BR-4361	0	0	1	0
	TCGA-BR-4362	0	0	1	0
	TCGA-BR-4363	0	0	1	0
	TCGA-BR-4366	0	0	1	0
	TCGA-BR-4367	0	0	1	0
	TCGA-BR-4368	0	0	1	0
	TCGA-BR-4369	0	0	1	0
	TCGA-BR-4370	0	0	1	0
	TCGA-BR-4371	0	0	1	0
	TCGA-BR-6452	0	0		0
	TCGA-BR-6453	1	1		0
	TCGA-BR-6454	1	1		0
	TCGA-BR-6455	0	0		0
	TCGA-BR-6456	0	0		0
	TCGA-BR-6457	1	1		0
	TCGA-BR-6458	1	1		0
	TCGA-BR-6563	0	0		0
	TCGA-BR-6564	1	1		0
	TCGA-BR-6565	0	0		0
	TCGA-BR-6566	0	0		0
	TCGA-BR-6705	0	0		0
	TCGA-BR-6706	0	0		0
	TCGA-BR-6707	0	0		0
	TCGA-BR-6709	0	0		0
	TCGA-BR-6710	0	0		0
	TCGA-BR-6801	0	0		0
	TCGA-BR-6802	1	1		0
	TCGA-BR-6803	0	0		0
	TCGA-BR-6852	1	1		0
	TCGA-BR-7196	0	0		0
	TCGA-BR-7197	0	0		0
	TCGA-BR-7703	1	1		0
	TCGA-BR-7707	0	0		0
	TCGA-BR-7715	1	1		0
	TCGA-BR-7716	1	1		0
	TCGA-BR-7717	1	1		0
	TCGA-BR-7722	0	0		0
	TCGA-BR-7723	0	0		0
	TCGA-BR-7851	1	1		0
	TCGA-BR-7901	0	0		0
	TCGA-BR-7957	0	0		0
	TCGA-BR-7958	0	0		0
	TCGA-BR-7959	0	0		0
	TCGA-BR-8058	0	0		0
	TCGA-BR-8059	0	0		0
	TCGA-BR-8060	1	1		0
	TCGA-BR-8077	0	0		0
	TCGA-BR-8078	0	0		0
	TCGA-BR-8080	0	0		0
	TCGA-BR-8081	0	0		0
	TCGA-BR-8284	0	0		0
	TCGA-BR-8286	0	0		0
	TCGA-BR-8289	0	0		0
	TCGA-BR-8291	0	0		0
	TCGA-BR-8297	0	0		0
	TCGA-BR-8361	0	0		0
	TCGA-BR-8362	0	0		0
	TCGA-BR-8363	0	0		0
	TCGA-BR-8364	0	0		0
	TCGA-BR-8365	0	0		0
	TCGA-BR-8366	0	0		0
	TCGA-BR-8367	0	0		0
	TCGA-BR-8368	0	0		0
	TCGA-BR-8369	0	0		0
	TCGA-BR-8371	0	0		0
	TCGA-BR-8372	0	0		0
	TCGA-BR-8373	0	0		0
	TCGA-BR-8380	0	0		0
	TCGA-BR-8381	0	0		0
	TCGA-BR-8382	0	0		0
	TCGA-BR-8384	0	0		0
	TCGA-BR-8483	0	0		0
	TCGA-BR-8484	0	0		0
	TCGA-BR-8485	0	0		0
	TCGA-BR-8486	0	0		0
	TCGA-BR-8487	0	0		0
	TCGA-BR-8588	0	0		0
	TCGA-BR-8589	0	0		0
	TCGA-BR-8590	0	0		0
	TCGA-BR-8591	0	0		0
	TCGA-BR-8592	0	0		0
	TCGA-BR-8677	0	0		0
	TCGA-BR-8678	0	0		0
	TCGA-BR-8679	0	0		0
	TCGA-BR-8680	0	0		0
	TCGA-BR-8682	0	0		0
	TCGA-BR-8683	0	0		0
	TCGA-BR-8686	0	0		0
	TCGA-BR-8687	0	0		0
	TCGA-BR-A44T	0	0		0
	TCGA-BR-A452	0	0		0
	TCGA-BR-A453	0	0		0
	TCGA-BR-A4CR	0	0		0
	TCGA-BR-A4CS	0	0		0
	TCGA-BR-A4IU	0	0		0
	TCGA-BR-A4IV	0	0		0
	TCGA-BR-A4IY	0	0		0
	TCGA-BR-A4IZ	0	0		0
	TCGA-BR-A4J1	0	0		0
	TCGA-BR-A4J2	0	0		0
	TCGA-BR-A4J4	0	0		0
	TCGA-BR-A4J5	0	0		0
	TCGA-BR-A4J6	0	0		0
	TCGA-BR-A4J7	0	0		0
	TCGA-BR-A4J8	0	0		0
	TCGA-BR-A4J9	0	0		0
	TCGA-BR-A4PD	0	0		0
	TCGA-BR-A4PE	0	0		0
	TCGA-BR-A4PF	0	0		0
	TCGA-BR-A4QI	0	0		0
	TCGA-CD-5798	0	0		0
	TCGA-CD-5799	0	0		0
	TCGA-CD-5800	0	0		0
	TCGA-CD-5801	0	0		0
	TCGA-CD-5803	0	0		0
	TCGA-CD-5804	0	0		0
	TCGA-CD-8524	0	0		0
	TCGA-CD-8526	0	0		0
	TCGA-CD-8528	0	0		0
	TCGA-CD-8529	0	0		0
	TCGA-CD-8530	0	0		0
	TCGA-CD-8531	0	0		0
	TCGA-CD-8532	0	0		0
	TCGA-CD-8533	0	0		0
	TCGA-CD-8534	0	0		0
	TCGA-CD-8535	0	0		0
	TCGA-CD-8536	0	0		0
	TCGA-CD-A486	0	0		0
	TCGA-CD-A487	0	0		0
	TCGA-CD-A489	0	0		0
	TCGA-CD-A48C	0	0		0
	TCGA-CD-A4MG	0	0		0
	TCGA-CD-A4MH	0	0		0
	TCGA-CD-A4MI	0	0		0
	TCGA-CD-A4MJ	0	0		0
	TCGA-CG-4301	0	0	0	0
	TCGA-CG-4304	0	0	0	0
	TCGA-CG-4305	0	0	0	0
	TCGA-CG-4306	0	0	0	0
	TCGA-CG-4436	0	0	0	0
	TCGA-CG-4437	0	0		0
	TCGA-CG-4438	0	0	0	0
	TCGA-CG-4440	0	0	0	0
	TCGA-CG-4441	0	0		0
	TCGA-CG-4442	0	0	0	0
	TCGA-CG-4443	0	0	0	0
	TCGA-CG-4444	0	0	0	0
	TCGA-CG-4449	0	0	0	0
	TCGA-CG-4460	0	0	0	0
	TCGA-CG-4462	0	0	0	0
	TCGA-CG-4465	0	0	0	0
	TCGA-CG-4466	0	0	0	0
	TCGA-CG-4469	0	0	0	0
	TCGA-CG-4472	0	0	0	0
	TCGA-CG-4474	0	0	0	0
	TCGA-CG-4475	0	0	0	0
	TCGA-CG-4476	0	0	0	0
	TCGA-CG-4477	0	0	0	0
	TCGA-CG-5716	0	0		0
	TCGA-CG-5717	0	0		0
	TCGA-CG-5718	0	0		0
	TCGA-CG-5719	0	0		0
	TCGA-CG-5720	1	1		0
	TCGA-CG-5721	1	1		0
	TCGA-CG-5722	1	1		0
	TCGA-CG-5723	0	0		0
	TCGA-CG-5724	0	0		0
	TCGA-CG-5725	0	1		0
	TCGA-CG-5726	0	0		0
	TCGA-CG-5732	0	0		0
	TCGA-CG-5734	1	1		0
	TCGA-D7-5577	0	0		0
	TCGA-D7-5578	0	0		0
	TCGA-D7-6518	0	0		0
	TCGA-D7-6519	0	0		0
	TCGA-D7-6520	0	0		0
	TCGA-D7-6521	0	0		0
	TCGA-D7-6522	0	0		0
	TCGA-D7-6524	0	0		0
	TCGA-D7-6525	0	0		0
	TCGA-D7-6526	0	0		0
	TCGA-D7-6527	0	0		0
	TCGA-D7-6528	0	0		0
	TCGA-D7-6815	0	0		0
	TCGA-D7-6817	0	0		0
	TCGA-D7-6818	0	0		0
	TCGA-D7-6820	0	0		0
	TCGA-D7-6822	0	0		0
	TCGA-D7-8570	0	0		0
	TCGA-D7-8572	0	0		0
	TCGA-D7-8573	0	0		0
	TCGA-D7-8574	0	0		0
	TCGA-D7-8575	0	0		0
	TCGA-D7-8576	0	0		0
	TCGA-D7-8578	0	0		0
	TCGA-D7-8579	0	0		0
	TCGA-D7-A4YT	0	0		0
	TCGA-D7-A4YU	0	0		0
	TCGA-D7-A4YV	0	0		0
	TCGA-D7-A4YX	0	0		0
	TCGA-D7-A4YY	0	0		0
	TCGA-D7-A4Z0	0	0		0
	TCGA-EQ-8122	0	0		0
	TCGA-EQ-A4SO	0	0		0
	TCGA-F1-6177	0	0		0
	TCGA-F1-6874	0	0		0
	TCGA-F1-6875	0	0		0
	TCGA-F1-A448	0	0		0
	TCGA-FP-7735	1	1		0
	TCGA-FP-7829	1	1		0
	TCGA-FP-7916	0	0		0
	TCGA-FP-7998	0	0		0
	TCGA-FP-8099	0	0		0
	TCGA-FP-8209	0	0		0
	TCGA-FP-8210	0	0		0
	TCGA-FP-8211	0	0		0
	TCGA-FP-8631	0	0		0
	TCGA-HF-7131	0	0		0
	TCGA-HF-7132	0	0		0
	TCGA-HF-7133	0	0		0
	TCGA-HF-7134	0	0		0
	TCGA-HF-7136	0	0		0
	TCGA-HU-8238	1	1		0
	TCGA-HU-8244	0	0		0
	TCGA-HU-8602	0	0		0
	TCGA-HU-8604	0	0		0
	TCGA-HU-8608	0	0		0
	TCGA-HU-8610	0	0		0
	TCGA-HU-A4G2	0	0		0
	TCGA-HU-A4G3	1	1		0
	TCGA-HU-A4G6	0	0		0
	TCGA-HU-A4G8	0	0		0
	TCGA-HU-A4G9	0	1		0
	TCGA-HU-A4GC	1	1		0
	TCGA-HU-A4GF	0	0		0
	TCGA-HU-A4GH	0	1		0
	TCGA-HU-A4GJ	0	0		0
	TCGA-HU-A4GN	1	1		0
	TCGA-HU-A4GP	1	1		0
	TCGA-HU-A4GT	0	0		0
	TCGA-HU-A4GU	0	0		0
	TCGA-HU-A4GX	0	1		0
	TCGA-HU-A4GY	0	1		0
	TCGA-HU-A4H0	0	0		0
	TCGA-HU-A4H2	0	0		0
	TCGA-HU-A4H3	0	0		0
	TCGA-HU-A4H4	0	0		0
	TCGA-HU-A4H5	0	0		0
	TCGA-HU-A4H6	0	0		0
	TCGA-HU-A4H8	0	0		0
	TCGA-HU-A4HB	1	1		0
	TCGA-HU-A4HD	0	0		0
	TCGA-IN-7806	1	1		0
	TCGA-IN-7808	0	0		0
	TCGA-IN-8462	1	1		0
	TCGA-IN-8663	1	1		0
	TCGA-IP-7968	1	1		0
	1, Patients with normal samples; 0, patients without normal samples.
