# Supplementary material for: Combining multi-dimensional data to identify key genes and pathways in gastric cancer
Source: PeerJ. 2017 Jun 6;5:e3385. doi: 10.7717/peerj.3385 (PMC5463969; doi:10.7717/peerj.3385)
Supplement: Table S2 [file peerj-05-3385-s002.xlsx]

## Sheet: Gene expression change
	Table S2. Multi-dimensional siganatures for gastric cancer (gene alteration).
	Gene Symbol	Gene expression change (log2 fold)	Corrected P-value
	ADH7	-8.00936	1.7012e-05
	PGA3	-7.91364	0.00251336
	CWH43	-7.36809	2.45072e-05
	PGA4	-7.18554	0.00374867
	ATP4B	-7.0167	0.000818618
	GKN1	-6.81704	0.00589188
	SERTM1	-6.76229	1.55738e-08
	WIF1	-6.70809	3.07622e-07
	KRT24	-6.45341	4.50502e-05
	PGA5	-6.41032	0.00501159
	HTR1E	-6.20036	6.6354e-07
	PLD5	-6.08317	1.12251e-06
	AQP4	-6.07028	1.10613e-07
	TRNA	-5.7851	0.000144596
	ATP4A	-5.75012	0.00523258
	FAM19A4	-5.64011	0.000157592
	SCGB1D2	-5.52308	0.000140148
	DCAF12L1	-5.49784	1.35861e-05
	SPINK7	-5.46652	0.00728776
	NKX6-2	-5.42766	0.00391023
	VSTM2A	-5.36294	0.000503888
	SOX21	-5.31911	0.00216271
	AGXT2L1	-5.31154	0.000234596
	PTF1A	-5.28789	0.0011401
	TRNA_Arg	-5.28669	0.000910649
	SH3GL2	-5.27782	1.84936e-07
	MYOC	-5.26326	0.000935269
	CIDEA	-5.19606	0.000157477
	KCTD8	-5.18415	2.6606e-05
	JA611288	-5.0988	0.00665259
	AQP7P3	-5.08298	0.000380803
	LGI1	-5.03757	2.5277e-06
	LOC255167	-5.0053	1.65315e-05
	LOC389493	-4.98709	0.000279943
	DQ579288	-4.94431	0.00144606
	MT3	-4.94143	2.24802e-06
	MAL	-4.88201	6.98276e-07
	AK055145	-4.87728	8.60078e-05
	PCSK2	-4.86392	5.1942e-06
	CCKBR	-4.85761	5.84931e-05
	BC038546	-4.84886	0.000302418
	CPB1	-4.83808	0.000809972
	TAC1	-4.8332	0.00237687
	LOC572558	-4.7282	2.50802e-05
	SCNN1B	-4.69575	7.53199e-07
	PNLIPRP3	-4.64496	0.00105702
	SLC5A7	-4.63816	0.00021528
	ASB5	-4.61549	0.00949634
	AB074160	-4.52223	0.000170801
	SCNN1G	-4.51844	0.000166391
	PHOX2B	-4.51594	0.00250071
	LRRTM1	-4.48269	1.80273e-05
	SERPINI2	-4.45664	0.000313212
	LOC389023	-4.45229	0.00162988
	CHRM2	-4.41382	0.00482618
	CMTM5	-4.37946	7.29863e-05
	AK310441	-4.37732	0.00237768
	SYT10	-4.36883	0.00014912
	RPTN	-4.35292	0.00242744
	MGAT4C	-4.31482	0.000117724
	CLEC3A	-4.3146	0.00384758
	GSTA3	-4.30496	0.0067008
	LOC100192426	-4.29025	0.00265661
	TRNA_Leu	-4.25608	0.00964898
	HBM	-4.24918	0.0030069
	ZDHHC22	-4.24796	0.000890018
	SPATA4	-4.22454	0.00235062
	HV303425	-4.22237	0.00920747
	AADACL2	-4.21581	0.00102776
	RPRM	-4.20701	2.85602e-06
	SOSTDC1	-4.20662	5.65756e-07
	HMP19	-4.17163	0.00172653
	MMP27	-4.15723	0.00119474
	BC039516	-4.15165	0.000478004
	PLP1	-4.14238	3.42315e-07
	ITGB1BP3	-4.13541	0.00270026
	CHST9	-4.12233	0.0012492
	SLC18A3	-4.12174	0.00872161
	AK055459	-4.1128	0.00719032
	SPINK2	-4.10175	0.00875904
	CCKAR	-4.08011	0.00842623
	HS3ST6	-4.07241	0.00620354
	LGI3	-4.05691	0.000419611
	GABRA5	-4.04284	0.000638805
	DYNLRB2	-4.00645	0.000250353
	C2orf40	-4.0058	1.06124e-05
	FLJ41941	-3.9959	0.000539459
	DPP10	-3.99277	0.00102327
	PMP2	-3.98007	7.03846e-05
	BC039521	-3.97722	0.000178601
	PWRN1	-3.97431	8.41341e-05
	DPP6	-3.9665	8.31261e-05
	FAM180B	-3.96216	0.00165382
	C12orf39	-3.95329	0.00635886
	BC025350	-3.93335	0.00100653
	OLFM3	-3.91647	0.00188463
	DNER	-3.90677	1.74317e-06
	NR0B1	-3.90381	0.00189683
	LOC645434	-3.88703	0.0015192
	JA483376	-3.86513	0.0098228
	ATP13A5	-3.85517	0.00142774
	NPY2R	-3.85233	0.00199793
	PAK7	-3.83317	0.00120893
	CTNNA2	-3.81176	0.00129213
	LOC100506795	-3.80925	4.08695e-05
	TEX26	-3.80861	0.00141111
	CA10	-3.793	0.000432364
	TUSC5	-3.78171	0.00794952
	BC070322	-3.78054	0.00238347
	CADM2	-3.77647	1.30755e-06
	HS6ST3	-3.77242	1.05676e-06
	RXRG	-3.76901	3.59179e-06
	BC015383	-3.7635	0.0023468
	PNCK	-3.7499	0.000415997
	ACADL	-3.74928	2.97238e-07
	FAM55D	-3.73771	0.00232329
	SORCS3	-3.7354	0.000682631
	FLG2	-3.7292	0.000101517
	BC017988	-3.72332	0.00363153
	AX747550	-3.71165	0.00263543
	LMX1A	-3.69276	0.00595761
	SYT4	-3.6824	0.00857785
	DPT	-3.66293	2.73715e-08
	LOC653061	-3.65973	2.10515e-05
	STK32A	-3.65849	0.000264805
	SLC6A4	-3.6563	0.00489233
	AL833634	-3.64296	0.000182099
	ESRRG	-3.63929	2.07339e-07
	SLC6A15	-3.63345	0.00462022
	HS3ST4	-3.63016	0.000221633
	GABRA1	-3.62493	0.00161575
	C2orf71	-3.59503	4.44692e-05
	LRRC3B	-3.58367	0.000206423
	CKMT2	-3.5818	6.56328e-10
	TMEM132C	-3.57954	5.55539e-06
	LRRC52	-3.5758	0.00545824
	SCAND3	-3.56841	6.78768e-06
	IRS4	-3.55622	0.00503345
	AX747383	-3.55516	0.00331599
	MAMDC2	-3.55237	1.54885e-08
	EPHA6	-3.55193	0.000823886
	LOC728606	-3.54603	0.00740608
	AX746596	-3.53746	0.0036275
	PGPEP1L	-3.52929	0.00438461
	FAM189A1	-3.52667	0.000163679
	SLITRK3	-3.52434	0.00113739
	KCNE2	-3.52253	0.00236665
	BC042616	-3.52141	0.00399509
	PEBP4	-3.49655	0.000108506
	SPHKAP	-3.4947	0.00278979
	TBL1Y	-3.4944	0.00145159
	ST8SIA3	-3.49091	0.00260535
	ATCAY	-3.48917	0.00236315
	KCNA2	-3.4838	0.000460028
	CHAT	-3.47887	0.00805897
	MAP7D2	-3.47798	2.87994e-07
	BC036435	-3.46135	0.00777913
	TCEAL5	-3.45904	0.00270695
	ANKRD7	-3.45302	0.00369173
	CNTFR	-3.45026	0.000287505
	NEFL	-3.4498	0.00597886
	ARHGEF26-AS1	-3.44947	0.00503804
	AX747935	-3.44462	0.00668243
	AK097722	-3.43027	0.00448548
	DHRS7C	-3.42109	0.00695797
	C16orf89	-3.42003	1.25643e-05
	PPP1R1A	-3.40214	0.000226523
	LOC100129620	-3.39062	0.000941125
	BTNL2	-3.38198	0.00656314
	SCTR	-3.36658	0.00179825
	FAM181A	-3.36262	0.00422558
	NPTX1	-3.36172	0.000445562
	SGCG	-3.36127	0.000891121
	AK055386	-3.35739	0.000267046
	NOS1	-3.35698	0.000381649
	LOC286002	-3.34901	0.00212745
	TMCO5A	-3.34432	0.00363067
	LOC388387	-3.34175	0.00404898
	AK128880	-3.33963	0.00673466
	RPS6KA6	-3.33813	9.49066e-13
	PCP4L1	-3.33635	0.00158337
	PRIMA1	-3.33602	5.75485e-06
	AK055856	-3.33377	0.00170009
	CD300LG	-3.32787	0.000143825
	KCNB1	-3.31778	7.58959e-05
	FAM135B	-3.31291	0.000325627
	TEPP	-3.31049	0.00443482
	GRIA2	-3.30333	0.00397468
	IGSF11	-3.29242	0.000306482
	SFRP1	-3.2902	1.74371e-06
	GPR12	-3.27978	0.00546692
	PTCHD1	-3.27644	0.000308544
	MRGPRX2	-3.2622	0.00813258
	FRMPD4	-3.25943	0.000720638
	WISP2	-3.25577	0.000145212
	AGTR1	-3.25047	0.000170725
	TCEAL2	-3.25044	0.00068805
	BVES-AS1	-3.2497	0.000313731
	SRRM4	-3.24634	0.000375652
	RDH12	-3.2414	1.52701e-05
	CHGB	-3.23941	0.00895535
	MAPK4	-3.22897	0.000571583
	FRRS1L	-3.21347	0.00569211
	DMRTA1	-3.19853	5.6522e-06
	KLHL1	-3.18046	0.0056637
	AK092143	-3.17243	0.00590254
	IRX6	-3.16471	0.00365499
	BHMT	-3.16213	0.000223145
	CCNA1	-3.15386	9.52462e-05
	CA4	-3.15151	0.000256334
	NRXN1	-3.1477	7.65228e-05
	LOC284276	-3.14424	0.000243688
	LRAT	-3.14025	0.00032639
	UNC5D	-3.13833	0.00114385
	ATP1A2	-3.13548	6.59973e-05
	PIRT	-3.13389	0.00842618
	AK308605	-3.13299	0.00694247
	VIP	-3.1237	0.00466422
	PHF21B	-3.09108	0.00639362
	MUM1L1	-3.09041	0.00129507
	PART1	-3.086	2.1374e-06
	SLC8A2	-3.07499	0.0063625
	HPCAL4	-3.05882	1.66494e-07
	KY	-3.0582	2.79719e-05
	ABCC8	-3.05699	0.00100429
	KCNMB2	-3.04427	0.000121248
	ATXN8OS	-3.04397	0.00314897
	HBB	-3.03782	6.80567e-06
	TMEM35	-3.0237	1.35291e-05
	CNTN1	-3.01873	0.00116392
	GSG1L	-3.01754	0.00139731
	PI16	-3.00338	0.000103023
	HCG23	-2.98801	0.00503273
	ADH1B	-2.98789	1.53502e-06
	SCARA5	-2.98611	1.45546e-06
	EEF1A2	-2.97857	9.18618e-05
	HTR4	-2.97549	0.000521846
	CPNE6	-2.97521	0.000616149
	GPM6A	-2.97383	0.00015411
	KIAA2022	-2.97046	5.61147e-07
	ADCYAP1R1	-2.96788	0.000332656
	CHODL	-2.96538	6.00254e-05
	TEX15	-2.96511	0.00338698
	PDZRN4	-2.96419	0.0012667
	NBLA00301	-2.9636	0.00726833
	SFRP5	-2.96121	0.00320374
	DES	-2.95778	0.000607529
	PLIN4	-2.95595	0.000529178
	CDH10	-2.9477	0.00966361
	AL390170	-2.94711	0.00252785
	CDH19	-2.93689	0.00028262
	GRIK3	-2.91653	9.26984e-05
	LPAR3	-2.91168	0.00121402
	PLCZ1	-2.90774	0.00593502
	SOX2	-2.90195	2.61788e-05
	HLF	-2.89822	2.33797e-05
	PLCXD3	-2.89672	5.53582e-06
	AK094342	-2.88744	0.00496011
	XKR4	-2.88705	0.00792527
	CYP4B1	-2.88447	0.00503505
	CKB	-2.87362	2.01856e-07
	SLC30A8	-2.86818	0.00038449
	GNAS-AS1	-2.85952	0.00851453
	ADHFE1	-2.85479	1.56003e-10
	SNRPN	-2.85436	0.00255634
	PTPRZ1	-2.85428	1.37224e-06
	BEX2	-2.85122	4.36812e-05
	LYVE1	-2.84734	1.26973e-08
	SORCS1	-2.83581	8.5175e-06
	UG0898H09	-2.82839	0.00163079
	SCN7A	-2.8277	0.000216184
	TLX3	-2.82389	0.00805615
	CMA1	-2.82109	0.00241116
	WDR49	-2.81972	0.00243922
	LOC100288346	-2.81608	0.000160003
	LOC100240734	-2.81501	0.00403956
	SNORD116-20	-2.8017	0.00496293
	TMEM100	-2.79142	1.18894e-05
	GRID2	-2.79084	0.00953473
	SHISA9	-2.79079	0.00150791
	MAPT-IT1	-2.78167	0.0093519
	KIF1A	-2.77293	0.00711003
	SEZ6L	-2.76156	1.98064e-05
	SLITRK5	-2.7614	0.000410236
	BEX1	-2.75799	0.00936436
	GFRA3	-2.75473	1.16313e-05
	ADRB3	-2.74666	0.00432239
	ACTG2	-2.74305	0.00083878
	MPPED1	-2.73614	0.0084504
	AKR1C2	-2.72455	0.000129041
	GPC5	-2.71885	0.000445091
	PGCP1	-2.71636	0.00795316
	NCAM1	-2.7152	8.45565e-06
	VIT	-2.69093	0.00027372
	MYOT	-2.68306	6.02655e-06
	CADM3	-2.67844	2.19526e-05
	MYH11	-2.6757	0.00093972
	ANGPTL1	-2.67241	9.53941e-05
	RIMS4	-2.67178	0.00040716
	CASQ2	-2.67003	0.000666386
	INA	-2.66579	0.000512654
	HSPB6	-2.66301	0.00122447
	LOC100128593	-2.65771	0.00196032
	ANGPTL7	-2.65769	0.00348994
	SLC27A6	-2.65738	0.00559926
	SCG3	-2.65458	0.00129617
	SLC38A3	-2.64851	0.00241683
	PRRT4	-2.64529	0.000586233
	PPP1R3C	-2.64092	2.1383e-05
	NEFM	-2.63849	0.0048566
	STXBP5L	-2.63786	0.00275264
	RASGEF1C	-2.63312	0.00975822
	BC036850	-2.63257	0.000156962
	HBT8	-2.6312	0.00016915
	C20orf166-AS1	-2.62405	0.000394251
	CNTN3	-2.62089	0.00139731
	TNNT3	-2.62044	0.00557441
	WDR17	-2.61168	6.4451e-06
	MTUS2	-2.61111	0.000590725
	HPGD	-2.60194	0.000273972
	PCDH20	-2.59932	0.000149225
	DLGAP2	-2.58978	0.000330261
	PGM5	-2.58824	3.88616e-05
	KLF15	-2.58241	5.71016e-05
	PRKAA2	-2.57068	0.000150445
	LDB3	-2.55816	0.000359117
	MAB21L1	-2.5568	5.25131e-05
	AK130904	-2.54951	0.000174161
	ARC	-2.54877	0.00178186
	NLGN1	-2.54154	5.92655e-05
	ENAM	-2.53553	0.000850305
	AL050132	-2.53384	0.00426999
	PEG3-AS1	-2.53305	0.00125354
	FOXD3	-2.53161	0.0041747
	BC013681	-2.52472	0.00865548
	LOC100131825	-2.52254	1.07633e-05
	LONRF2	-2.52111	0.000177204
	FXYD1	-2.51958	2.39356e-06
	GRIA4	-2.51519	0.000707151
	ASPA	-2.51452	1.77927e-09
	C7	-2.51216	0.00220975
	GPR27	-2.51058	1.03609e-05
	GABRG1	-2.50706	0.00993754
	FCER1A	-2.49772	0.000789404
	CNN1	-2.49476	0.00183238
	C9orf71	-2.49328	0.000851962
	AX747977	-2.49061	0.000638275
	HSPB8	-2.48677	7.94189e-05
	ALDH1A2	-2.48621	7.26508e-05
	ZNF385B	-2.48557	8.36109e-06
	SYNM	-2.46854	0.00524978
	GCNT4	-2.45591	6.47002e-07
	PKHD1L1	-2.45412	5.85492e-06
	ABCA8	-2.43447	2.95842e-05
	HPSE2	-2.42564	0.00102958
	CDH22	-2.42092	0.00217003
	FHL1	-2.41968	1.36442e-05
	ADH1A	-2.41526	0.00197665
	PCOLCE2	-2.39947	0.00262281
	GFRA1	-2.38925	0.000466372
	ZNF536	-2.37779	6.00281e-06
	BC036594	-2.37366	0.00920747
	P2RX2	-2.37272	0.00415027
	COL4A6	-2.3669	0.000206502
	SPTSSB	-2.36626	0.00733762
	C1QTNF9	-2.36433	0.00834815
	ERBB4	-2.36367	0.000468657
	FAM153A	-2.359	0.00907275
	PYGM	-2.35299	0.000457936
	DAND5	-2.35098	0.00670591
	CLEC3B	-2.35004	2.91075e-07
	RIMS1	-2.34256	0.000454543
	RGN	-2.34175	4.14335e-06
	GABRB2	-2.33981	0.00925909
	RELN	-2.33809	1.06219e-05
	MYRIP	-2.33474	1.68721e-05
	C8orf46	-2.32557	0.00629667
	FABP4	-2.32537	0.000188359
	BCHE	-2.32147	0.000580862
	CLCNKA	-2.31678	0.00178053
	ZBTB16	-2.31676	0.000105741
	AF090102	-2.30587	0.000723823
	LOC100507244	-2.29603	1.95554e-05
	RERGL	-2.29578	7.42367e-05
	KRBOX1	-2.28876	0.000953274
	OPCML	-2.28119	4.38543e-05
	LOC728978	-2.27596	1.4739e-05
	APOBEC2	-2.27243	2.14504e-06
	CHRDL1	-2.26554	0.00121554
	RBPMS2	-2.25987	0.000288786
	HBA2	-2.2581	8.87447e-05
	ADRB2	-2.25652	2.60007e-09
	PLN	-2.24798	0.00105638
	ADAMTS9-AS2	-2.24563	2.69202e-05
	HIF3A	-2.24486	0.000821636
	RYR3	-2.24465	0.000238481
	LY6H	-2.24241	0.00142216
	SLC2A4	-2.2421	0.000302628
	CHAD	-2.23942	0.000207334
	SYNPO2	-2.23245	0.00112413
	CAMK2B	-2.23117	3.57261e-05
	RIC3	-2.22952	4.02916e-05
	SHISA6	-2.22888	0.0012667
	SOX10	-2.22498	0.00086061
	GFRA2	-2.22151	8.58809e-05
	GRIN2A	-2.22041	0.000606541
	FMN2	-2.21849	0.00388574
	NAP1L2	-2.21768	9.17739e-06
	LOC283392	-2.2135	0.00915657
	UBE2QL1	-2.21196	8.37811e-07
	LMOD1	-2.20795	0.000709169
	GPM6B	-2.20201	0.000124612
	RSPO2	-2.19777	0.00669412
	HBA1	-2.18193	0.000241693
	CFD	-2.17598	2.05445e-06
	LCN6	-2.17502	0.000624891
	PSD	-2.16957	0.00926431
	PABPC1L2A	-2.16154	0.009765
	S100A12	-2.15772	0.00136884
	BC024173	-2.14759	0.00444803
	CDHR1	-2.14728	0.00717561
	CETN4P	-2.14282	0.00895535
	LOC100127983	-2.13614	0.000923816
	DIO3OS	-2.13345	0.00238613
	HMGCLL1	-2.13316	0.000375352
	PDK4	-2.12478	0.000454956
	GPR155	-2.11879	6.90358e-08
	ZNF662	-2.11067	2.3247e-08
	GSTM5	-2.11061	2.77452e-05
	PACRG	-2.10168	0.000573343
	PLIN1	-2.0977	0.00644575
	KCNJ15	-2.09709	0.00483649
	KBTBD12	-2.09012	0.00520475
	REEP1	-2.0897	8.84531e-05
	SYN2	-2.08786	0.000181226
	SLITRK6	-2.08678	8.09401e-05
	CES1	-2.08654	0.00240286
	CCDC169-SOHLH2	-2.08084	0.00207993
	KCNK3	-2.07937	0.00024539
	CPEB1	-2.07395	3.45772e-05
	GHR	-2.05949	1.01875e-06
	C1QL1	-2.05124	3.41387e-05
	BC075797	-2.05023	0.00756736
	CACNA2D3	-2.04544	1.22057e-05
	DKFZp779M0652	-2.04417	0.00402765
	IP6K3	-2.03853	8.78466e-05
	GNG7	-2.03721	2.56697e-08
	GPER	-2.02831	3.3946e-05
	PCDH9	-2.0231	0.00169768
	CRYAB	-2.01323	0.000484452
	TPTEP1	-2.01314	8.58864e-07
	ZFR2	-2.01282	0.00695397
	WSCD2	-2.00542	0.00570155
	OGN	-2.00465	0.00752751
	MT1M	-1.99811	0.000393074
	NIM1	-1.99728	6.58991e-05
	C17orf109	-1.99012	6.05972e-07
	KRT222	-1.98982	5.79869e-07
	HOMER2	-1.98851	0.00141193
	CNR1	-1.9793	0.00170731
	ALDH1L1	-1.9778	0.00513959
	PAR5	-1.97451	6.06188e-05
	TMEM63C	-1.97383	0.00518938
	LOC100506388	-1.96803	4.22618e-07
	TPSG1	-1.9668	0.00050804
	CUX2	-1.96188	0.00184828
	BMPER	-1.95793	0.000550123
	MAPT	-1.95409	0.00561779
	SCUBE2	-1.94752	7.57155e-05
	BX647249	-1.94569	0.00331276
	GPX3	-1.9454	4.93292e-07
	PEG3	-1.94305	0.000291122
	ARHGEF26	-1.94231	0.000444754
	DIRAS1	-1.94146	0.000245489
	PDZD4	-1.93928	0.000199757
	C1orf95	-1.9384	0.000590469
	NECAB1	-1.93573	0.00204899
	SCN2B	-1.93425	0.000576108
	NEGR1	-1.93215	0.000118022
	GAMT	-1.93006	9.3628e-07
	NRG2	-1.92583	0.000954513
	METTL24	-1.92127	0.000649052
	AFF3	-1.9201	6.3963e-05
	SBSPON	-1.91465	0.00051365
	S100B	-1.91108	4.51246e-05
	AK130329	-1.9089	0.00020804
	CLDN10	-1.90115	0.00767634
	DLG2	-1.89652	0.000890774
	MSTN	-1.8888	0.00122926
	DNASE1L3	-1.88763	0.00352207
	ADRA1A	-1.88723	0.00975591
	ASB2	-1.88716	0.00082194
	HSPB7	-1.88713	0.00852777
	CCL14	-1.88636	0.000168003
	USP2	-1.88582	0.000477825
	PAIP2B	-1.88371	1.57743e-05
	KCNMB1	-1.87742	0.00122372
	ADARB2	-1.87657	0.00298259
	KIAA0408	-1.87265	0.00129894
	AK097702	-1.87228	0.0015368
	LOC283481	-1.86719	7.00957e-05
	ST8SIA6	-1.86433	0.00266651
	FOXP2	-1.86344	0.00234435
	DIRC3	-1.86215	0.00319375
	ANO5	-1.86169	0.0019278
	SGCA	-1.85687	0.00234362
	CCBE1	-1.84935	6.1817e-06
	MYOCD	-1.84472	0.00191537
	BAI3	-1.82733	0.00620495
	SFTPD	-1.8243	0.0023894
	LINC00086	-1.82402	0.00013984
	BC070118	-1.82041	0.000588188
	LOC644554	-1.81816	0.000345399
	CAB39L	-1.81816	9.16223e-06
	HTR7	-1.81581	3.32856e-05
	PTN	-1.81543	9.79222e-06
	ABI3BP	-1.81458	0.00291071
	PLEKHG4B	-1.81312	0.00051365
	NRG4	-1.8106	0.0020114
	NPR3	-1.80139	0.00179478
	SORBS1	-1.79576	0.00261754
	ENPP6	-1.79416	0.00154546
	P2RY14	-1.79335	8.07953e-06
	MYL9	-1.79141	0.00599162
	RAB9B	-1.7863	0.00042718
	ZNF676	-1.78619	0.00162652
	JPH2	-1.7836	0.00995285
	MAOA	-1.78213	0.000474591
	PARK2	-1.78002	8.27447e-06
	PGR	-1.77929	0.000812029
	EFCAB1	-1.77758	0.000273071
	KLRF1	-1.77643	0.00270976
	RIMBP2	-1.76928	0.00694247
	ANKRD35	-1.76844	0.000272722
	SNRPN	-1.76389	4.17124e-05
	KIT	-1.76299	0.000162352
	ENTPD3	-1.76213	0.000333158
	SUSD4	-1.75956	0.00694894
	C18orf34	-1.7594	0.0066137
	MMRN1	-1.75853	2.23204e-05
	NUDT10	-1.75668	0.000788329
	C5orf4	-1.75278	0.000102986
	DUSP26	-1.75257	0.0017353
	ADAM33	-1.75203	0.000559304
	FP588	-1.74833	0.000151047
	LOC400043	-1.74521	0.000749156
	CRTAC1	-1.74318	0.00681425
	GPR64	-1.7431	0.000310159
	FNDC5	-1.73417	0.00069189
	LOC154822	-1.73035	0.00343976
	MUSK	-1.72612	0.00936746
	FAM107A	-1.72371	4.5832e-05
	FAM189A2	-1.7151	0.000364434
	FGF14	-1.71385	0.000688202
	GNAO1	-1.70524	0.00983846
	ZNF471	-1.70385	1.88552e-05
	NME5	-1.70054	0.000676803
	FAM150B	-1.70001	0.00010065
	BVES	-1.69947	0.00183779
	MAOB	-1.69368	0.00033659
	GREM2	-1.69305	0.000432196
	SORBS2	-1.69119	0.000236775
	SLC8A3	-1.69101	0.00673658
	POPDC3	-1.69018	0.00837653
	COL4A5	-1.67723	0.00113627
	AR	-1.67553	0.00173796
	ZSCAN23	-1.6755	9.3633e-05
	PKNOX2	-1.67427	0.000127938
	SEMA3D	-1.6667	0.00346214
	BEND5	-1.66456	0.000333896
	SH3BGR	-1.66167	0.00133592
	LRRC4	-1.65816	9.33351e-05
	AK5	-1.65793	0.00188863
	NTN1	-1.65636	0.000931591
	VIPR2	-1.65029	0.00450345
	DTNA	-1.64693	0.000615136
	C3orf15	-1.64622	0.00808792
	SOGA3	-1.64609	0.00272821
	IPW	-1.6413	0.000342527
	MPZ	-1.64021	0.00047328
	CYP11A1	-1.63986	0.00222855
	ANKRD31	-1.63876	0.000507063
	FLJ35024	-1.63829	0.000257073
	NDRG4	-1.63012	0.000469223
	LEPREL1	-1.62629	0.000480918
	CHRM4	-1.62114	0.00908576
	TXLNB	-1.61749	2.55701e-05
	FLJ36777	-1.61627	0.00297682
	C15orf59	-1.61402	0.000994796
	RADIL	-1.6105	4.17325e-05
	DNAJB5	-1.60553	0.00292943
	ARL4D	-1.60386	0.00758486
	CHL1	-1.60377	0.000197741
	F10	-1.59471	0.00490491
	ASXL3	-1.59333	0.00051374
	F13A1	-1.59246	0.000798338
	BC033961	-1.59135	0.00718984
	DMGDH	-1.58987	0.000714268
	DMD	-1.58917	0.00199206
	ZNF415	-1.58855	7.49866e-06
	SLC2A12	-1.58739	3.68211e-05
	CDO1	-1.58648	0.00518377
	MASP1	-1.58125	0.00331599
	RGMA	-1.57712	0.00781195
	NOVA1	-1.57367	0.00177319
	METTL7A	-1.57299	8.59517e-08
	PLAC9	-1.57211	0.00034385
	SLC24A5	-1.57046	0.00987637
	SLC35F3	-1.56696	0.00842283
	C1QTNF7	-1.56597	0.00850899
	PLIN5	-1.56584	0.000113013
	ZSCAN18	-1.56547	8.13952e-05
	RNF112	-1.56231	1.08247e-05
	RNF212	-1.56025	0.000117251
	ZNF626	-1.55878	2.1789e-07
	PTGER3	-1.55525	0.000604942
	ANK2	-1.55031	0.00469966
	LOC643529	-1.54915	0.000129173
	BEX4	-1.54897	3.84699e-05
	PPP2R3A	-1.54771	0.000125951
	ATRNL1	-1.54771	0.00260325
	PDZRN3	-1.54577	0.00112743
	KCNQ5	-1.54528	0.00449179
	ZNF793	-1.54288	0.000100254
	SLC16A7	-1.53489	0.000261768
	DIRAS3	-1.53449	0.000282485
	ATOH8	-1.53121	3.88221e-05
	MAP6	-1.52964	0.00210941
	SEC14L5	-1.5282	0.00289844
	TSLP	-1.52412	0.00253186
	BC043188	-1.52385	0.00028591
	ADCY2	-1.5224	0.00446793
	TRIM58	-1.51908	0.000348456
	CCDC69	-1.51891	4.47077e-05
	ACSL6	-1.50131	0.00174584
	MPP7	-1.50098	0.000243738
	BTG2	-1.49996	0.000966848
	DIO3AS	-1.49745	0.00163529
	MYEF2	-1.49657	0.00963886
	CD36	-1.49592	0.00147583
	TNXB	-1.48815	0.00246237
	ZNF229	-1.4877	0.000540777
	LOC100240735	-1.48666	7.16203e-05
	FGL2	-1.48587	0.00394112
	CFL2	-1.48408	0.00314717
	SNRPN	-1.48107	1.59575e-05
	DARC	-1.4733	0.000676043
	PTH1R	-1.47064	0.000304845
	KIAA1045	-1.46785	0.00973334
	ADAMTSL1	-1.4655	2.239e-05
	FLJ35946	-1.46332	0.000655138
	SDPR	-1.46148	0.000239182
	SOX2-OT	-1.45964	0.00128261
	RGS2	-1.45389	0.000322361
	BHMT2	-1.45385	0.00147061
	GLRB	-1.44911	0.00504719
	LOC100287846	-1.4485	0.00341886
	PID1	-1.44395	0.00160089
	SCN3A	-1.44307	0.00146581
	ACOX2	-1.44299	0.000480688
	SLC22A17	-1.4414	0.00109594
	TUB	-1.43503	0.00160164
	SLC7A8	-1.43455	0.000330951
	RNLS	-1.43396	6.75509e-06
	BTC	-1.4316	0.00016851
	LOC100128252	-1.42753	0.000214209
	HDC	-1.42647	0.00512348
	GRIA3	-1.42305	0.00206006
	MAPK10	-1.42114	0.000763701
	SPESP1	-1.42083	0.000519934
	C7orf58	-1.41627	0.00432184
	CYBRD1	-1.41431	0.00034256
	C12orf53	-1.40909	0.00641612
	CCDC110	-1.40845	0.00346814
	SLC25A4	-1.40596	1.82488e-05
	EFHA2	-1.40408	0.000472062
	LIFR	-1.40081	0.000216403
	C14orf132	-1.4008	0.00223905
	IGFBP6	-1.39966	0.00078469
	NACAD	-1.39903	0.00732055
	FOXF1-AS1	-1.39876	0.00114242
	SRPX	-1.39686	0.000317082
	ANKRD53	-1.39684	0.000279458
	RUNDC3A	-1.39628	0.00984555
	ATP1B2	-1.3927	0.0042706
	ID4	-1.39025	8.54149e-06
	PTX3	-1.38704	0.000558001
	ZNF300P1	-1.38684	0.00397086
	LOC344887	-1.37468	0.00917659
	PPP1R3G	-1.37369	0.000443021
	PCDH19	-1.37347	0.000243462
	LINC00087	-1.37253	0.000122028
	BC073932	-1.37082	0.00780954
	PTPLA	-1.36982	0.00643237
	TACR1	-1.36641	0.000649904
	PDE1C	-1.3662	0.000174189
	LOC100129794	-1.36506	0.00343678
	CECR7	-1.36462	0.0035495
	VLDLR	-1.36393	0.00171143
	SMAD9	-1.36365	0.00153079
	C22orf23	-1.36189	0.000345077
	PDE9A	-1.35883	0.00235287
	BNIP3	-1.35788	0.000135947
	ARMCX1	-1.35689	0.000180732
	CACNB4	-1.35671	0.00125322
	LDOC1	-1.34038	0.000171937
	CLU	-1.3402	0.00833509
	PRKAR2B	-1.33407	0.000429653
	GHRLOS	-1.33404	0.00786937
	MFAP4	-1.33206	0.00180057
	RAB6B	-1.33146	0.000432196
	ADAMTSL3	-1.33116	0.00897055
	L3MBTL4	-1.32788	0.00186093
	LOC100133286	-1.32377	0.000764096
	BAALC	-1.32113	0.00841382
	RCAN2	-1.32064	0.00195409
	PTGS1	-1.31736	5.3355e-05
	H2AFY2	-1.30891	2.74729e-05
	ARHGEF25	-1.30204	0.00995488
	CARNS1	-1.29308	0.000846453
	TTLL7	-1.28903	0.00741643
	RNF180	-1.2862	0.000464123
	PKIA	-1.28516	0.00315115
	GNMT	-1.28489	0.00763324
	NKAPL	-1.28326	0.00646198
	KAT2B	-1.28221	2.13159e-07
	DIXDC1	-1.28048	0.00213161
	CSRP1	-1.27857	0.00543069
	TSC22D3	-1.27748	5.32566e-05
	EFS	-1.27605	0.00462661
	SSBP2	-1.2753	4.96147e-05
	HOXA4	-1.27385	0.00676763
	D4S234E	-1.27311	0.00454763
	RBP7	-1.27078	0.0043138
	JAM2	-1.26965	0.000876872
	GALNTL2	-1.26815	0.00151682
	C11orf92	-1.26685	0.00859732
	ZFP28	-1.26663	0.000739687
	PPP2R2B	-1.26627	0.00256675
	CBR1	-1.26505	0.000967827
	CYP39A1	-1.26356	0.00478107
	CTSF	-1.2535	0.00241939
	PDE2A	-1.25076	0.000784034
	ZCWPW2	-1.2506	0.000261402
	SLC17A7	-1.24229	0.00914827
	HSPB2	-1.24205	0.00195501
	ANKRD65	-1.23794	0.00198401
	CPE	-1.23645	0.00937541
	BC043188	-1.23578	0.00200881
	CLMP	-1.23574	0.00996109
	PER1	-1.235	0.00012509
	FAM149A	-1.23116	0.000320509
	RGMB	-1.22798	0.00018526
	ARHGAP20	-1.22612	0.003279
	LURAP1	-1.22535	0.00089997
	TMEM25	-1.22261	0.00209265
	ZNF135	-1.22096	0.000965091
	SLC9A9	-1.21928	8.72996e-05
	ARHGEF37	-1.21737	4.25319e-06
	LINC00092	-1.21478	0.000397212
	CBX7	-1.21354	0.000601087
	SEPP1	-1.21315	0.00440123
	SPG20	-1.2113	0.000187404
	PTGR1	-1.20975	0.000551472
	LOC284408	-1.20927	0.000164324
	ZNF677	-1.20867	0.000282474
	ANKRD29	-1.20719	0.00260692
	SNX32	-1.20591	0.00780152
	LOC100507299	-1.20458	0.000767516
	CLIP4	-1.20431	0.0042266
	TGFBR3	-1.20374	0.00621228
	AGPAT9	-1.19849	0.00442014
	C3orf18	-1.19827	0.00102877
	SCARA3	-1.19759	0.00383665
	PER3	-1.19752	0.00181513
	AK055981	-1.19668	0.00233614
	SYT15	-1.19492	0.00133991
	KIF6	-1.19353	0.00683844
	MAGEE1	-1.18715	0.00561154
	ELL2	-1.18272	2.40761e-06
	GPLD1	-1.18258	0.00298953
	LRRN4CL	-1.17741	0.00922914
	ZNF331	-1.17609	0.00714985
	GSN	-1.17514	9.07876e-06
	EFHC2	-1.171	0.00897501
	ZNF470	-1.16913	0.000876822
	GGTA1P	-1.16904	6.69659e-05
	ZNF568	-1.16724	0.000164762
	MIR29B2	-1.16683	0.00117847
	CLEC10A	-1.16606	0.00907275
	BC037839	-1.15621	0.00053917
	KLF4	-1.1543	0.000253535
	NDRG2	-1.15241	2.52009e-06
	CCDC152	-1.14574	0.00589766
	ME1	-1.14292	0.00085891
	ZNF582	-1.13799	0.000249563
	ZNF781	-1.13513	0.00928243
	GLIPR1L2	-1.13509	0.00679967
	STL	-1.13325	0.00337298
	DAB1	-1.13317	0.000263197
	C14orf64	-1.13275	0.00601398
	IL11RA	-1.13255	0.000111715
	ZDHHC15	-1.13149	0.00354604
	RGS11	-1.13118	0.000696331
	ACACB	-1.13115	0.00261706
	C6orf225	-1.13017	0.00560732
	LDHD	-1.13014	0.00715282
	TMEM27	-1.12922	0.00320094
	LOC386758	-1.1284	0.00671174
	KLF9	-1.1279	0.00141717
	DUSP1	-1.12619	0.00384903
	SPAG16	-1.1241	0.00226882
	C3orf14	-1.12397	0.0028563
	TSPAN7	-1.12325	0.00573545
	C8orf42	-1.12103	0.00105886
	STK32B	-1.12052	0.0068448
	C10orf116	-1.12025	0.00721546
	THSD4	-1.11902	0.00819573
	LPAR1	-1.11831	0.000100276
	LANCL3	-1.11109	0.00625498
	DCN	-1.10911	0.00326192
	FOXF2	-1.10841	0.00785908
	SERP2	-1.10798	0.00506652
	CITED2	-1.10419	9.02856e-07
	CR627135	-1.09804	0.00858499
	PBX1	-1.09523	0.00420146
	PTPRS	-1.09518	0.00698311
	SETBP1	-1.09355	0.00956215
	ALDH6A1	-1.08821	2.88353e-07
	ALDOC	-1.07857	0.000305915
	COL23A1	-1.07767	0.00951069
	MAPK8IP1	-1.0772	0.00738052
	MAGI2	-1.07628	0.00807624
	NR3C2	-1.07374	0.0063733
	AMT	-1.07354	0.00370961
	FAM110B	-1.07104	0.00898106
	TEF	-1.06901	0.00036207
	AL157440	-1.06591	0.0082516
	ZNF542	-1.06236	0.00122521
	TMEM220	-1.05913	0.0002234
	TNFAIP8L3	-1.05876	0.00754558
	NR3C1	-1.05315	3.30498e-06
	RORB	-1.05123	0.0094933
	LRRK2	-1.04596	0.00797792
	FAM66C	-1.0449	0.00752561
	ZNF829	-1.04459	0.00142324
	RNF217	-1.04269	0.00222193
	LOC100131060	-1.04147	0.00284267
	ITM2A	-1.0397	0.00307564
	ZDBF2	-1.03147	0.00681258
	SNPH	-1.03109	0.00916524
	MIR22HG	-1.02667	9.39844e-07
	STAB2	-1.02381	0.00854837
	MAF	-1.02065	0.0010092
	NDN	-1.01668	0.00535769
	CELF2	-1.0156	0.00752751
	ABCA6	-1.01469	0.00662194
	GYPC	-1.01428	0.00366603
	ZNF418	-1.01116	0.00633145
	CROT	-1.00983	0.00252684
	OSBPL6	-1.00925	0.00811985
	CEP250	1.00019	6.11466e-06
	DOCK6	1.00063	4.2728e-08
	BC029255	1.00077	0.000100086
	ANXA2	1.00088	0.00230541
	ABL2	1.00136	2.39326e-06
	SHROOM3	1.00137	0.00992815
	B3GNTL1	1.00157	1.41705e-09
	STIP1	1.00192	9.45424e-12
	TNFSF13B	1.00212	0.00652895
	TTC16	1.0022	0.00075203
	IGSF8	1.00268	1.114e-05
	FAM111A	1.00276	2.96413e-07
	SERINC5	1.00391	7.46351e-05
	IGFBP7	1.00427	0.00384229
	BC150585	1.0043	3.52056e-06
	AGAP8	1.00433	0.00545824
	CCT3	1.00579	1.77391e-12
	PTDSS1	1.00587	8.53744e-09
	BC041347	1.00647	0.000934299
	BCL6B	1.00651	6.78301e-05
	PA2G4P4	1.00675	1.4435e-06
	C5orf28	1.00789	9.69691e-07
	EFHD2	1.00794	0.000752696
	EXOSC4	1.00825	9.65452e-08
	CEP135	1.00828	9.33224e-06
	CNNM4	1.0091	0.00185015
	PCNXL3	1.00911	4.2728e-08
	BX647243	1.00924	2.67918e-07
	SEH1L	1.00942	3.32045e-08
	WNT5A	1.00964	0.00590935
	COL27A1	1.00976	0.00365499
	IPO4	1.01017	3.47415e-11
	ZNF473	1.01022	4.19124e-08
	ARAP3	1.01048	9.21897e-06
	NT5DC2	1.01084	0.000390737
	PREP	1.01106	6.37751e-07
	ABRACL	1.01338	0.00346948
	COX19	1.01348	1.33403e-09
	EGFLAM	1.01394	0.00537836
	ABCD1	1.01439	0.0038696
	AK097625	1.01501	0.00667426
	LOC642846	1.01546	0.00283395
	RPN2	1.01562	1.04182e-06
	TMEM62	1.01609	1.01528e-06
	XPO6	1.0163	2.98952e-09
	PPP1R9B	1.01637	4.3183e-09
	AK056368	1.01637	0.00121719
	KIAA0754	1.01698	0.001727
	CLEC11A	1.01737	0.000301212
	LRRC56	1.01772	0.0022548
	HAUS8	1.01808	2.50595e-08
	ZNF217	1.01867	0.0001663
	ALDH18A1	1.01901	5.29385e-05
	POLD3	1.01918	3.54018e-07
	ETV5	1.01977	0.00293778
	PDZD8	1.01978	0.000100018
	GINS3	1.01986	5.09596e-05
	MYO5C	1.02	0.00394647
	DDX54	1.02014	1.00641e-10
	RBBP8	1.02034	6.94654e-06
	DJ439529	1.02059	0.00274685
	CPSF1	1.02062	1.01706e-07
	TMEM97	1.02071	0.00138365
	MIR4728	1.02076	0.00412134
	UTP18	1.02084	3.21594e-10
	TMSB10	1.02101	0.00013781
	SHANK3	1.02101	5.51355e-05
	MEGF6	1.02138	0.00298489
	ATP13A1	1.02144	1.76433e-07
	B3GNTL1	1.02284	0.00288696
	MORC2	1.02294	2.68324e-09
	CYB5B	1.02318	8.10546e-07
	PLA2G16	1.02327	0.00709465
	ATAD3C	1.02359	0.00703597
	ANKH	1.02392	7.34478e-05
	GNL3	1.02403	1.35381e-06
	CORO7-PAM16	1.0241	2.95409e-07
	GRWD1	1.02459	4.00026e-10
	ACTL10	1.0249	5.03859e-05
	OSBPL10	1.02584	1.05214e-05
	C1orf159	1.02608	9.8947e-11
	TRRAP	1.02631	4.88779e-06
	ZBTB33	1.02649	6.24211e-07
	MAZ	1.0266	2.65071e-10
	SMG9	1.02697	7.06326e-10
	PHF16	1.02717	1.19057e-06
	BX537481	1.0275	0.000888862
	MIS18A	1.02759	1.20313e-07
	TARBP1	1.02772	1.8457e-06
	PTPRJ	1.02781	0.00634341
	CCR1	1.02781	0.00645318
	MDC1	1.02787	5.43553e-06
	BTNL9	1.02797	0.00181434
	BX648855	1.0285	0.00251831
	ALG8	1.02885	1.41528e-08
	ERBB3	1.02949	0.000907543
	DQ595000	1.02952	0.000804346
	ANAPC1	1.03024	1.0268e-05
	PIWIL4	1.0309	0.000707044
	HMBS	1.03096	5.53241e-06
	NOC3L	1.03127	1.85935e-06
	HN1L	1.03129	1.82271e-09
	PLEKHG5	1.03149	0.000817469
	ENO1	1.03169	5.47582e-07
	TUBB	1.03178	1.48683e-10
	SEC61A2	1.03179	8.55489e-07
	RAB20	1.03186	0.00320094
	STK3	1.03189	6.78768e-06
	TFRC	1.03199	0.000205955
	PDRG1	1.03203	1.41245e-08
	SOX12	1.03206	0.000142663
	NPRL3	1.03207	4.36005e-11
	MSI2	1.0322	6.29143e-06
	FAM222A	1.03238	0.00815304
	AK056073	1.0328	0.00144493
	PLBD2	1.03287	1.22734e-07
	CCDC88C	1.03318	4.17505e-05
	PPM1G	1.03341	1.95087e-11
	EIF4EBP1	1.03342	0.000290318
	E2F5	1.03347	2.25671e-05
	SLC25A19	1.0335	1.10213e-05
	REPIN1	1.03352	2.94024e-06
	ZNFX1	1.03357	4.27395e-06
	MYO10	1.03357	0.000194377
	C20orf94	1.03404	5.49447e-05
	TMTC4	1.03419	5.21651e-06
	FOXRED2	1.03434	3.12222e-06
	BMS1	1.03462	2.35289e-09
	AX746590	1.03537	1.82488e-05
	CEP78	1.03556	5.74174e-07
	LOC146880	1.03577	0.00267269
	PLOD1	1.03584	1.04754e-06
	LOC90784	1.03597	4.5832e-05
	RCE1	1.03615	7.26159e-07
	RPP40	1.03653	9.16812e-06
	GTF2IRD1	1.03755	6.25378e-05
	ZBTB12	1.03767	4.39632e-05
	BC043573	1.03788	0.00380665
	NPHP4	1.03789	1.07689e-07
	THOC2	1.03793	4.48631e-07
	ZBED4	1.038	1.67182e-07
	XPOT	1.03839	3.85139e-08
	DQ601342	1.03841	0.000240985
	CHORDC1	1.0391	3.7896e-08
	ACTR5	1.03914	3.46527e-09
	CTSS	1.03941	0.00541438
	RAI14	1.03943	4.15203e-05
	ZNF696	1.03954	2.09937e-08
	FAM187A	1.03963	0.00424734
	C1orf226	1.03974	0.000177221
	ANXA4	1.03978	0.00691849
	BC042098	1.04058	0.00111255
	MSTO1	1.04068	2.98952e-09
	DTX3L	1.04094	8.27584e-07
	LRRC61	1.0411	3.35503e-05
	IL15RA	1.0415	5.92514e-06
	PKD1L1	1.04171	0.000340646
	ANXA2P1	1.04176	0.00175652
	MEN1	1.04206	1.5792e-08
	PPFIA3	1.04265	0.000593606
	RRP1	1.04287	1.93414e-08
	DAGLA	1.04316	0.000613132
	CD300A	1.04319	0.00988923
	NLE1	1.04329	7.75759e-09
	SLC7A5P1	1.04349	0.00227028
	MEX3B	1.04354	0.000444031
	DNAJC2	1.04401	1.61717e-07
	NAT9	1.04445	1.30779e-07
	DDX56	1.04492	1.69511e-11
	KDM1B	1.04493	1.52017e-06
	BC047513	1.04525	6.5802e-06
	EFNA1	1.04577	1.58347e-05
	PSTPIP1	1.04613	0.0023144
	NRM	1.04641	1.93884e-08
	SLC15A3	1.04661	0.000137635
	NIP7	1.04695	8.90359e-09
	TAF1D	1.04698	3.41387e-05
	PDIA3	1.04713	4.38928e-07
	HIST1H2BG	1.04801	0.00823
	SDCCAG3	1.04805	4.75562e-10
	PPAN-P2RY11	1.04855	5.11708e-10
	PRKX	1.04865	8.93747e-05
	ADRBK1	1.04993	2.70913e-07
	DJ439574	1.05069	0.00148154
	BC122864	1.05097	1.04746e-05
	AK057188	1.05139	0.000290883
	XYLB	1.05144	0.00022913
	KDR	1.05154	4.52086e-05
	LOC642846	1.05232	0.000100741
	TCIRG1	1.05246	3.22905e-06
	SLC39A1	1.05246	1.71194e-09
	NCL	1.05255	5.23627e-11
	TOPBP1	1.05263	1.02808e-06
	PIGU	1.05288	5.83826e-09
	DJ439566	1.05303	0.00174571
	BUB3	1.05327	4.06062e-11
	TRMT1	1.0533	3.65164e-10
	CDK12	1.05402	2.21684e-06
	SRC	1.05511	7.97789e-06
	CCT2	1.05605	8.19074e-12
	PRPF4	1.05605	4.11112e-12
	TNFRSF1B	1.05639	0.00337543
	SLC7A1	1.05644	0.000208105
	PYCARD	1.05757	0.00644575
	ZNF792	1.05769	1.26588e-05
	FOXP4	1.05826	2.67883e-05
	SMYD5	1.0583	5.81521e-10
	MFSD10	1.05873	2.64926e-08
	WDR12	1.05901	9.52768e-08
	TPBG	1.05931	0.000438582
	BCAT1	1.05964	0.00792567
	NUP62	1.0597	9.45424e-12
	ZNF618	1.05996	0.000135407
	PAK1IP1	1.06039	5.23056e-09
	TRIM28	1.06118	1.91993e-09
	AP5Z1	1.06157	1.12814e-08
	GIT1	1.0616	3.06535e-09
	TFEC	1.06239	0.00570233
	NUP188	1.0626	2.06281e-07
	PDE7A	1.06274	5.95993e-06
	ZNFX1-AS1	1.06325	1.44889e-05
	CMTM1	1.06331	1.45072e-06
	CLPB	1.06339	4.12424e-09
	SLC16A3	1.0635	0.000627052
	FBXL19	1.06356	4.4624e-07
	SFXN2	1.0638	0.000698243
	AX746834	1.06436	0.00703453
	MARS2	1.06436	8.59227e-06
	FAM49B	1.06469	3.73258e-07
	PMM2	1.06479	0.000163893
	BTBD19	1.06495	0.00181513
	AX747104	1.06503	0.00071166
	SELRC1	1.0651	1.6987e-08
	TYROBP	1.06524	0.00686902
	SP140	1.06529	0.00522383
	42624	1.0655	8.46257e-09
	AK091729	1.06565	4.43775e-08
	ODC1	1.06574	8.51768e-05
	PDIA4	1.06644	0.000524706
	ZNF707	1.06665	6.30681e-09
	EHMT2	1.06665	3.77972e-09
	SNRPB	1.06687	8.4991e-08
	HHEX	1.06756	0.00182575
	SLMO1	1.06756	0.00146665
	TMEM194A	1.06829	8.67923e-05
	LOC100506599	1.06843	0.000293778
	SAMD10	1.06859	0.000722574
	GRINA	1.06905	6.91116e-08
	CPNE1	1.06971	1.90631e-10
	RAVER1	1.06989	3.38633e-09
	TPM3	1.07067	1.59974e-05
	GLA	1.0707	9.28358e-08
	NASP	1.07077	1.40537e-09
	LIN9	1.07086	4.34589e-06
	ZFPM1	1.0714	0.000942664
	NEIL2	1.07297	0.00124931
	DCTPP1	1.07298	1.6842e-05
	PRIM1	1.07312	3.84534e-06
	LOC728758	1.07322	0.000117978
	SNORD2	1.07327	0.000553031
	TIGD5	1.07351	6.26418e-09
	SLC39A8	1.07448	0.00404178
	LOC100287042	1.07453	7.95685e-07
	KLHL17	1.07544	8.76811e-05
	ATG9B	1.07545	0.00951069
	QTRTD1	1.07574	3.95287e-11
	ADRM1	1.07575	2.85618e-12
	RBM28	1.07603	3.55692e-08
	HIST1H2BD	1.07606	0.00505304
	HSPH1	1.07828	3.36433e-06
	NFAM1	1.07903	0.0033775
	DQ574852	1.07911	0.000110107
	POLR1C	1.07916	3.84153e-10
	F11R	1.0793	0.00185291
	PTGES2	1.07934	6.56328e-10
	AKAP5	1.0802	0.000341173
	SMARCA4	1.08102	1.01769e-07
	RNF207	1.08128	9.66046e-05
	GTPBP5	1.08216	3.99355e-09
	PROCR	1.08264	0.00069189
	CD86	1.08293	0.00182782
	NEK8	1.08347	0.000137558
	AK056817	1.08376	0.000398817
	PARVG	1.0838	0.00660416
	C7orf29	1.08392	4.12498e-05
	FAM26E	1.08403	0.000246719
	CDK2	1.08506	2.77522e-09
	SPATA12	1.08507	0.00157547
	ANP32E	1.08525	3.61222e-08
	CSTF2	1.08618	2.65024e-07
	INPP5D	1.08627	0.00230164
	FBXL19-AS1	1.08674	1.40246e-05
	ZNF703	1.08721	0.00799367
	TSEN54	1.08723	3.40049e-06
	DPM2	1.08725	3.27828e-07
	DQ592682	1.08787	0.00755599
	CCDC19	1.08871	4.94975e-05
	PON2	1.08909	0.0024901
	HYOU1	1.08927	3.42501e-05
	DOK5	1.08936	0.00432239
	WDR43	1.08947	1.42754e-09
	NUAK1	1.09068	1.54036e-05
	TMEM164	1.09121	0.00016654
	AGTRAP	1.09121	4.18236e-09
	BC041434	1.0919	0.00234604
	AK097791	1.09283	0.00892259
	ICA1	1.09307	0.000103379
	hCG_1980662	1.09365	2.23852e-07
	CMTM8	1.09373	0.00131812
	ADPGK	1.0938	1.10086e-07
	ETS1	1.09558	0.000106855
	LAMA5	1.09593	0.00956878
	MYO19	1.09607	2.40381e-05
	SLC45A4	1.09607	0.000465168
	TRPV2	1.09652	0.000507063
	NUP107	1.09668	1.28922e-08
	FBXL18	1.09851	5.97873e-06
	C5orf58	1.09866	0.00337685
	ZC3H3	1.09907	3.95287e-11
	HSP90AB1	1.09948	9.49066e-13
	FPGS	1.09994	2.6694e-11
	TUBA1C	1.10064	0.0020173
	PLA2G15	1.10126	2.78409e-10
	CTSA	1.10134	9.52917e-06
	PIEZO1	1.10141	0.000149065
	HEATR1	1.10283	8.90174e-10
	ADCK5	1.10338	6.78768e-06
	RASAL2	1.1034	9.59421e-05
	LOC389906	1.10395	6.28257e-05
	LOC648987	1.10401	0.000222771
	KCTD13	1.10414	4.57372e-08
	SPNS1	1.10415	4.6101e-09
	BEND3	1.10427	0.0012407
	POLE	1.10435	2.40872e-06
	LOXL1	1.10524	0.000136501
	MCTP2	1.10536	0.00126279
	PTBP3	1.10641	4.40084e-05
	CAMK2N1	1.10646	0.00993239
	SERPINB9	1.10729	0.000348186
	PILRA	1.10834	0.00191369
	GLB1L	1.10855	8.68864e-05
	SFMBT1	1.10868	9.57101e-10
	SURF6	1.1101	1.17417e-09
	TAP2	1.11017	7.87719e-05
	CAMK2N2	1.11064	0.007991
	FANCC	1.11071	1.82063e-09
	PTBP1	1.11085	3.39771e-10
	MILR1	1.11108	0.00265352
	AX748066	1.11201	0.00261188
	TGS1	1.11217	2.39089e-09
	MAFG-AS1	1.11232	0.00021344
	ITGB2	1.11255	0.00698558
	LRRC8B	1.11277	1.71885e-07
	LOC100128191	1.11297	9.21897e-06
	SLC43A3	1.11306	5.73842e-06
	UPP1	1.11342	0.00216671
	SPRN	1.11387	9.67951e-09
	NOTCH1	1.11396	0.000671228
	SOLH	1.11398	3.13858e-05
	AK097472	1.11411	1.8078e-10
	LOC100131096	1.11423	7.8721e-05
	ADAMTS4	1.1143	0.00995435
	PLEKHG2	1.1144	0.000145055
	TTI1	1.11517	8.24611e-11
	PNPT1	1.11533	2.70685e-08
	C16orf93	1.11535	5.52858e-08
	MAP4K4	1.11571	1.97505e-07
	EIF3B	1.1168	9.49066e-13
	LOC100294362	1.11688	0.00160695
	HAUS5	1.11749	1.14463e-06
	FYB	1.11771	0.00155868
	MIR4745	1.11899	3.34128e-07
	PTPN6	1.11905	0.00277712
	NOC4L	1.11912	3.60853e-10
	SLC39A14	1.11971	0.00350472
	ANXA2P3	1.11979	0.00516168
	MEX3D	1.12021	1.91993e-09
	PROSER1	1.12061	1.22875e-08
	ARHGEF1	1.12067	2.95219e-07
	RANGAP1	1.12082	1.88575e-10
	WDR76	1.12121	2.81369e-06
	CBX3	1.12139	3.95287e-11
	CASP8	1.1215	4.39863e-07
	ERI1	1.12193	1.6145e-07
	CCNB3	1.12196	0.00372218
	FAM213B	1.12249	0.000230607
	AGAP2	1.12284	8.13983e-06
	INHBB	1.12296	0.00129213
	CHPF	1.12379	6.22734e-06
	RAC3	1.12425	0.00516792
	ADAMTS9	1.12458	0.000370775
	PLEC	1.12462	0.00105538
	ANKS6	1.12516	3.14068e-08
	MSH2	1.12529	4.86057e-06
	NKRF	1.12531	9.13299e-08
	HLA-A	1.12557	0.00170731
	BCL2L1	1.12607	3.47597e-07
	TMC8	1.12616	0.00674387
	HLX	1.12628	1.80331e-05
	SPIN4	1.12681	0.00054829
	NUDT1	1.12729	3.19835e-10
	IFITM3	1.1274	0.000342527
	MYO1E	1.12764	3.64412e-06
	ABHD16B	1.12809	4.4624e-07
	PHF14	1.12853	1.74023e-07
	GMNN	1.12868	2.27962e-05
	TBRG4	1.1292	2.14142e-10
	CECR6	1.12948	0.00123382
	BRMS1	1.12966	2.4413e-08
	SLC16A8	1.1301	0.000386944
	GLIS3	1.13036	0.00540946
	DDX27	1.13044	1.50513e-08
	SGK196	1.13091	8.32469e-05
	PDSS1	1.13099	0.000309306
	FANCF	1.13104	7.15248e-07
	LMTK2	1.13181	9.35228e-05
	NUDT5	1.13189	3.51102e-06
	LOC100507564	1.13221	1.0713e-05
	CHML	1.1328	5.59471e-05
	ARFGAP1	1.13292	1.3405e-09
	SUV39H2	1.13295	2.82524e-09
	SASS6	1.13303	1.78658e-07
	FAM24B	1.13326	9.83242e-06
	ISYNA1	1.13364	7.1479e-05
	EFNB1	1.13392	0.000110889
	HRH1	1.13425	5.78284e-06
	AK001057	1.13433	0.00167289
	XRCC3	1.13508	2.07325e-08
	DHCR7	1.1352	8.11187e-05
	C4orf46	1.13525	4.8401e-07
	AK296947	1.13545	5.42658e-07
	ZNF267	1.13571	4.39863e-07
	CLSTN3	1.13588	1.65394e-05
	RELB	1.13603	5.15857e-06
	SUV420H2	1.13686	2.32383e-08
	NOP58	1.13687	1.02868e-08
	DIEXF	1.13692	1.24037e-09
	MIR939	1.13746	6.22001e-08
	SF3B3	1.13795	9.67951e-09
	BCL7A	1.13808	4.34997e-07
	REEP4	1.13827	0.000359819
	RPS17L	1.13893	4.65143e-05
	AX748339	1.13932	6.94799e-05
	GAS2L3	1.13952	0.000696143
	USP18	1.13954	0.00120893
	SNRPD1	1.14058	1.48964e-07
	UTP14A	1.14201	2.49454e-11
	AK297919	1.14213	4.24948e-06
	KIFC2	1.14231	6.97294e-05
	CD3EAP	1.1429	1.64814e-10
	NSUN5	1.1442	1.72878e-12
	PRAM1	1.14481	0.000299988
	B3GALT6	1.14532	9.48583e-10
	SNORA65	1.14583	0.00727651
	PLXDC1	1.14587	1.19197e-05
	PKP2	1.14599	0.00261137
	FAM110A	1.14642	0.00119469
	C20orf72	1.14652	6.53662e-08
	AEBP1	1.14673	0.00189877
	MIR937	1.14676	2.52666e-06
	CASP2	1.14735	1.80228e-08
	FRMD8	1.14767	7.00136e-08
	TNS3	1.148	5.02485e-06
	CERKL	1.14807	0.00176821
	TIPIN	1.14809	6.77191e-09
	LMTK3	1.14866	0.00148154
	SLCO3A1	1.14873	0.000226926
	AK123617	1.14875	0.0096628
	ZGLP1	1.14879	0.000608283
	DJ417913	1.14886	0.00846271
	ACPL2	1.14902	2.88576e-06
	LOC100507501	1.14934	0.00060091
	ARL6IP1	1.14979	1.76108e-06
	PKM2	1.14984	3.77595e-07
	C11orf84	1.15094	1.86997e-07
	C10orf10	1.15145	0.000435056
	Y16709	1.15177	2.07827e-05
	SNAPC4	1.15237	1.90159e-11
	BC039523	1.1528	6.39562e-05
	PSMB9	1.15318	0.0055206
	FAM102B	1.15323	2.43894e-07
	GLB1L2	1.15488	0.000101681
	ADORA1	1.15492	0.00061876
	BC114455	1.15562	0.000601187
	GPR176	1.15563	0.000617728
	TTLL10	1.1557	0.00111754
	ZNF468	1.15624	5.1549e-06
	HEATR2	1.15628	8.00371e-12
	EFTUD2	1.15734	1.55003e-10
	ATXN2L	1.15743	1.65825e-08
	PCDHB9	1.15746	0.00261366
	FPR3	1.15758	0.0021371
	USP31	1.1576	1.25694e-05
	CDH6	1.1576	0.000125782
	CBWD5	1.15764	0.00222973
	GGCT	1.15778	6.05871e-09
	PPRC1	1.15843	4.10949e-08
	LAIR1	1.15896	0.00290656
	SAMD12	1.159	0.000607301
	BRAT1	1.15948	5.79121e-10
	HIP1R	1.15997	0.00586505
	LRRC45	1.16002	3.58832e-06
	MZT1	1.16021	2.31044e-07
	CKAP5	1.16142	1.57733e-08
	PATL2	1.16182	0.00375241
	RGS19	1.16265	0.0018416
	ZBTB9	1.16293	2.71396e-09
	TIMM8A	1.16489	2.59209e-11
	ZNF252P-AS1	1.16517	4.26698e-05
	LOC100131347	1.1657	3.35503e-05
	PRIM2	1.16608	9.60172e-10
	NBEAL2	1.16745	0.00157547
	RELL2	1.16825	1.20372e-06
	AK057719	1.1683	3.61601e-07
	LOC100505666	1.16891	0.000730137
	NPM3	1.16949	3.26451e-05
	PPFIA1	1.1697	4.05236e-09
	MRTO4	1.16989	1.08589e-11
	SMC4	1.17002	1.29213e-05
	HELB	1.17005	9.61191e-06
	DYX1C1	1.17091	0.000449307
	FBXO5	1.17126	7.89697e-07
	EML4	1.1713	3.68105e-07
	RFC4	1.17247	1.47138e-08
	ENG	1.17265	1.3036e-06
	HCAR1	1.17272	0.000384553
	SLC35E4	1.17299	1.68959e-06
	RCCD1	1.17337	4.37681e-08
	ARNTL2	1.17376	0.00105021
	MIR1244-1	1.17385	0.000547936
	RPUSD1	1.17402	5.18777e-09
	ZNF761	1.17404	2.19091e-09
	ZNF165	1.17433	3.35503e-05
	PARD6B	1.17533	0.000365977
	DARS2	1.17602	3.11827e-07
	HOXD9	1.1762	3.07247e-05
	ATIC	1.17652	8.00371e-12
	PPM1N	1.17658	5.78964e-05
	EXOSC5	1.17671	6.51787e-07
	SLC35A2	1.17733	8.79157e-06
	TCF19	1.17788	4.06737e-06
	NNMT	1.17848	0.000322811
	RPL19P12	1.1788	0.0070429
	ABCE1	1.17905	5.72948e-08
	PSMD3	1.17948	3.85517e-07
	NOC2L	1.17952	7.69733e-11
	AZI1	1.18029	2.89935e-07
	RAB42	1.18038	0.000410884
	CCDC103	1.18061	0.000715545
	NCLN	1.18129	7.67798e-07
	SNHG15	1.18179	8.87441e-08
	SNORD35A	1.18194	0.00755486
	ASS1	1.18315	0.000464285
	NOLC1	1.18338	1.51546e-09
	FLJ34208	1.18511	0.000463568
	ABLIM2	1.18564	0.0013008
	SLFN12L	1.18649	0.00916185
	FASN	1.18692	7.12343e-06
	CCDC18	1.18722	2.81998e-06
	HIST1H2BJ	1.18732	1.50564e-05
	TH1L	1.19	9.68599e-10
	GMIP	1.19001	0.00105538
	ACP5	1.19059	0.000790328
	NSUN2	1.19066	1.08878e-08
	TM4SF19	1.19068	0.00354114
	CSE1L	1.19169	4.03075e-08
	ABCA7	1.19177	0.000182513
	SRD5A1	1.19226	0.000482321
	EMILIN2	1.1923	0.000115679
	TGIF1	1.19318	8.92607e-10
	CCT6A	1.19329	1.05983e-11
	OPLAH	1.19358	8.97127e-05
	LOC286190	1.19364	4.49747e-06
	RANBP17	1.19484	0.00427594
	TET3	1.19517	0.00010994
	PRR22	1.19561	0.000247631
	GPR85	1.19595	8.96491e-05
	HIST1H2AE	1.19605	0.00261835
	LBH	1.19625	0.000182081
	VCAM1	1.19648	0.0047282
	BICD1	1.19717	2.63385e-05
	MIR4641	1.19733	1.33268e-05
	AMIGO3	1.20031	6.7175e-05
	DJ417906	1.20033	0.00367916
	SRGAP1	1.20051	1.55173e-06
	HIST2H2BF	1.2007	2.81454e-05
	PITPNM1	1.20079	0.000565291
	TMPO	1.20182	6.35467e-08
	S100A5	1.20196	0.0077033
	CLMN	1.20299	3.21704e-05
	C1QTNF5	1.20304	0.000107421
	SIGLEC9	1.2034	0.00100002
	PDCD2L	1.20356	1.8178e-08
	BORA	1.20403	1.91934e-07
	AEN	1.20437	9.37752e-08
	HSF2BP	1.20635	1.17824e-05
	CTSC	1.2069	2.30584e-06
	UNC13D	1.20693	0.00353848
	AK296146	1.20751	3.53148e-05
	CBFB	1.20869	2.49813e-08
	TNRC18	1.20917	4.24948e-06
	IQCE	1.20944	5.70159e-06
	VASH1	1.20952	7.38363e-09
	MFSD2B	1.2102	0.00173476
	CDCA4	1.21043	2.83896e-07
	LOC100506810	1.21146	0.00011045
	LOC388906	1.21283	0.000940069
	UTP20	1.21296	4.3095e-08
	DDR1	1.21418	3.72559e-05
	EFCAB5	1.21419	0.000162241
	ZNF643	1.21439	1.47574e-05
	HDGF	1.21477	3.5739e-10
	GPATCH4	1.21545	2.6102e-12
	HIST1H3H	1.21583	0.00737876
	UCK2	1.21609	6.40149e-10
	ZMYND19	1.21724	1.18962e-10
	ALG3	1.21885	5.55864e-10
	RUNX3	1.21927	0.00635597
	MASTL	1.21958	1.71092e-09
	NAT10	1.21968	1.08942e-10
	APOBR	1.21969	0.0010933
	ZNF296	1.22061	0.00641623
	WHSC1	1.22241	4.7441e-07
	DLEU2	1.22261	3.51635e-07
	SNORD44	1.22295	0.000983538
	BRIX1	1.22318	2.29426e-10
	EME1	1.22347	1.36147e-05
	CYBA	1.22454	0.00467111
	C1orf112	1.22455	4.59805e-09
	SLC12A9	1.22644	8.79059e-09
	ALG1L2	1.22678	0.00340234
	MYBBP1A	1.22687	4.55992e-09
	SNORD104	1.22702	0.000958271
	RCN1	1.2276	3.42978e-08
	TNFSF15	1.22814	0.00079589
	NUP155	1.22816	1.53723e-06
	PAK6	1.22904	0.00975591
	PIK3R2	1.22909	4.6321e-07
	TIGD1	1.22993	3.41561e-08
	GBP4	1.22998	0.000935269
	PVRL2	1.23059	2.97716e-05
	SLC24A6	1.23121	5.54987e-09
	DCLRE1B	1.23157	1.64589e-10
	CD84	1.23165	0.000353523
	LRRC46	1.23287	1.2022e-06
	TMEM180	1.23292	5.90854e-08
	ADAMTS6	1.23305	0.0021606
	SNORD36A	1.23308	0.000333711
	SIPA1L3	1.23359	0.000244495
	ATP13A2	1.23434	1.1141e-06
	CCT5	1.23464	1.0693e-09
	SUSD1	1.23531	0.00014423
	PXDN	1.23544	0.00159199
	BCL2L12	1.23662	3.5739e-10
	FMNL2	1.23705	2.58961e-06
	SNORD50B	1.23742	0.00146845
	AX747756	1.23752	0.00753282
	MCM6	1.23819	2.28369e-09
	SUV39H1	1.23833	2.71396e-09
	SHMT2	1.23834	7.22016e-06
	SP140L	1.23837	5.70652e-09
	PVR	1.23841	1.91993e-09
	LOC439990	1.23843	0.000290874
	CCNJ	1.23851	3.3298e-08
	TM4SF1	1.23914	0.00058221
	NEK6	1.23966	0.000306362
	MIR17HG	1.23976	0.000306362
	RACGAP1	1.24053	4.84201e-07
	DDX31	1.24125	9.21601e-11
	OLFM2	1.24162	0.000353691
	EXOC3L2	1.24184	6.02531e-05
	CYB5R2	1.24196	0.00189683
	MAD1L1	1.24232	9.45424e-12
	LOC100130776	1.24239	5.75094e-08
	TRMT6	1.24294	3.39771e-10
	MORC4	1.24348	1.38997e-08
	STMN1	1.24349	1.13315e-07
	DCAF13	1.24451	2.96032e-10
	ADCY3	1.24453	5.49453e-10
	AK123584	1.24495	9.37668e-05
	ANKRD5	1.24656	4.83517e-05
	TGM2	1.24696	0.00183281
	KCNK4	1.24737	0.0066137
	BC125159	1.24749	1.14716e-07
	FGD6	1.24758	0.0001841
	BST2	1.24834	0.00210663
	AK055694	1.24877	7.84032e-05
	SBNO2	1.24912	1.01417e-06
	IRF7	1.25063	7.55063e-05
	LOC388796	1.25095	7.38383e-07
	KIF24	1.25104	1.55282e-09
	C20orf3	1.25108	2.52847e-09
	PLXND1	1.25115	7.76631e-06
	FAM91A1	1.25118	5.12536e-09
	MIR1292	1.25125	0.000127195
	PLBD1	1.2514	0.000116312
	HTRA3	1.25251	0.00520392
	LTBP2	1.25283	0.000119657
	BC043511	1.25287	0.00475183
	SEMA6B	1.25288	3.99568e-06
	FNDC8	1.25298	1.57511e-05
	GRAP	1.25305	0.00109415
	MANEAL	1.25315	0.000183219
	ZNF860	1.25361	0.00069072
	PLXNA3	1.25384	4.68974e-06
	CACNA1F	1.25459	0.00125466
	CRYM-AS1	1.25479	0.00866977
	SCRIB	1.25498	4.59795e-08
	CARD10	1.25572	0.000278349
	SCARB1	1.2566	0.000463115
	DBF4B	1.25737	5.77453e-10
	RNF213	1.25814	5.94679e-05
	AK125463	1.25819	3.36913e-09
	POLR1A	1.25826	1.48737e-08
	IL27RA	1.2595	0.000100114
	UBASH3B	1.26188	4.77687e-05
	DSN1	1.2625	1.49267e-08
	ARHGAP4	1.26319	0.00107826
	ODF2	1.26383	1.08589e-11
	ATP2A1	1.26482	1.12297e-05
	SAC3D1	1.26516	9.49066e-13
	GLIS3-AS1	1.26573	0.00701231
	HIST1H4E	1.26637	0.00112013
	FHOD1	1.26654	3.47415e-11
	JA375062	1.2669	1.07689e-07
	LOX	1.2679	2.95409e-07
	MCM5	1.2686	9.96078e-08
	CTSB	1.26924	6.51787e-07
	LOC100125556	1.27006	9.13572e-09
	ZNF697	1.27025	4.03809e-06
	LPPR4	1.27236	0.000430516
	SNORD62A	1.27251	0.00647496
	LYAR	1.27312	4.74561e-09
	DPY19L1	1.27322	1.54956e-08
	ZMIZ2	1.27393	3.75519e-11
	LOC100527964	1.27408	7.22078e-05
	MRM1	1.27446	9.41934e-09
	HECW2	1.2745	0.000135603
	TTF2	1.27476	1.86675e-07
	C10orf95	1.27713	3.9764e-05
	ARHGEF16	1.27738	0.00926431
	HIST1H2AK	1.27769	0.000925659
	SPON2	1.27777	5.77825e-10
	KIAA1024	1.27798	4.78797e-05
	TRAF4	1.27853	0.00141083
	RRBP1	1.28019	3.68084e-06
	DDX39A	1.28075	2.42386e-06
	AK094859	1.28121	0.00537836
	DIO2	1.28202	0.00323926
	LAPTM5	1.28312	0.000898433
	NOTCH4	1.28336	7.793e-10
	CTPS1	1.28346	2.77701e-08
	ZDHHC23	1.28366	0.00033278
	MOV10L1	1.2837	0.00342406
	TRIB2	1.28376	4.67034e-06
	STEAP1	1.2841	1.70362e-05
	ENTPD6	1.28477	4.77022e-06
	LOC100302401	1.28525	4.77022e-06
	PFAS	1.28598	2.75129e-10
	CASK	1.28599	2.4417e-08
	MCCD1	1.28612	0.00927225
	HIST1H2AG	1.28647	0.000112853
	GGT5	1.28666	1.92568e-05
	SLC38A7	1.28696	3.95287e-11
	TFAP2E	1.28835	0.000704259
	STAT1	1.28947	7.9252e-06
	SMC2	1.2906	3.64563e-08
	SLC1A3	1.29103	0.00582306
	IGSF6	1.29111	0.000351185
	TCOF1	1.29156	4.11112e-12
	PODXL2	1.29383	0.0022053
	WDR38	1.29441	0.00180883
	SMAD6	1.29501	0.000441877
	FTH1P3	1.29552	0.000273969
	DPP3	1.29665	3.19092e-06
	SNORA26	1.29739	0.00286491
	TINAGL1	1.2975	1.75423e-06
	CCDC99	1.29756	1.52201e-08
	ZDHHC9	1.29807	3.52586e-07
	WDR4	1.29832	1.51546e-09
	SLC35F2	1.29854	0.000564733
	BC132896	1.29878	0.00037546
	MYO1B	1.29955	4.07706e-08
	FSTL3	1.30082	0.00145616
	CEP85	1.30123	4.32166e-08
	COL4A2	1.30138	0.000930521
	DPH2	1.30262	8.00371e-12
	SAPCD1	1.30281	3.33546e-06
	SIX4	1.30318	0.00655023
	HIST3H2A	1.30343	0.00321698
	PRRX1	1.30356	0.00043082
	ATAD3A	1.30398	3.80108e-10
	SAMD3	1.30508	0.0048452
	FAT1	1.30518	7.70052e-05
	TOP1MT	1.30638	1.39839e-09
	KCNAB2	1.30738	0.000169416
	NFKB2	1.30804	2.42729e-07
	CENPH	1.30889	1.73965e-08
	POLR1B	1.31041	7.52858e-11
	FAM84B	1.31077	9.12827e-05
	C16orf55	1.31183	1.23729e-09
	NOS3	1.312	1.77192e-08
	IKBKE	1.3123	0.00211139
	SCO2	1.31253	1.66133e-05
	LACTB2	1.31326	1.46132e-06
	SCARF2	1.31349	0.0010422
	AX747730	1.3136	1.68258e-08
	WARS	1.31376	0.000125692
	FIGNL1	1.31387	1.22015e-08
	DCBLD1	1.31471	1.4873e-07
	C4orf21	1.31477	9.93057e-06
	SRCRB4D	1.31622	1.00956e-07
	IFITM1	1.31634	0.00108826
	AX746523	1.31788	0.000214714
	PFKFB2	1.31805	0.000261768
	SH2D3A	1.31809	0.00797792
	MSL3P1	1.32051	0.000302968
	CCND1	1.32068	0.000123239
	C18orf54	1.32093	8.02713e-07
	AK294004	1.32094	0.00030721
	CDSN	1.32283	0.00628951
	SH2B3	1.32446	1.23421e-07
	VARS	1.3246	1.42236e-09
	FCER1G	1.32487	0.000233073
	RBL1	1.32518	3.06455e-08
	CCDC138	1.32571	4.13519e-06
	PRR5L	1.32687	7.59477e-05
	CD55	1.32706	0.00184242
	TTLL4	1.32828	5.28529e-08
	RGS16	1.32839	0.000398818
	CIT	1.32843	9.43382e-09
	NOP56	1.32871	2.13386e-11
	PARP14	1.32901	3.61007e-07
	KCNK13	1.33001	0.00687612
	DPF1	1.33024	7.94254e-05
	ETV7	1.33033	0.00364207
	WDR90	1.33056	3.33523e-06
	AX747493	1.33124	2.80635e-06
	KLF16	1.33492	3.92843e-08
	RRS1	1.33512	3.45156e-11
	GJA4	1.33522	4.30348e-06
	VOPP1	1.33529	4.29916e-05
	GTPBP4	1.33556	3.58295e-12
	BAIAP2L1	1.3362	0.0069083
	PTPRO	1.33683	0.000164846
	MCM3	1.33685	7.67133e-11
	ZP3	1.33755	0.000255068
	COTL1	1.33772	0.000878836
	PADI2	1.33842	0.00183465
	JAK3	1.33877	0.00109622
	EIF2C2	1.33903	2.05059e-09
	LRRC37A6P	1.33912	0.00638281
	AX747537	1.33918	3.09156e-05
	HSPD1	1.33963	3.46106e-11
	HES4	1.34151	8.60296e-05
	PIF1	1.34234	3.06733e-06
	TNFRSF25	1.34334	6.80759e-05
	WDR67	1.34391	2.38376e-09
	TTLL9	1.34526	0.00413707
	ELOVL7	1.34671	6.40773e-05
	PSD4	1.34689	0.00675012
	FCGR2A	1.34788	4.93891e-05
	FAAH2	1.34805	0.00291942
	SMC1B	1.34866	0.00960278
	AK093551	1.3493	3.50479e-05
	CD97	1.34943	3.98004e-06
	DHX34	1.35115	1.90159e-11
	WDR96	1.3512	6.67697e-05
	TNNI2	1.35123	0.00101824
	RIN1	1.35202	4.39404e-05
	NUDCD1	1.35205	2.18995e-10
	ELFN1	1.35234	1.37606e-06
	LRRC32	1.35258	1.16564e-05
	MLEC	1.35388	7.3293e-08
	PAICS	1.35438	5.91481e-11
	TNIP3	1.35496	0.00719608
	DL490908	1.35511	0.000330534
	LPAR2	1.35514	0.00517898
	LOC144486	1.35553	0.00138735
	KAT2A	1.35595	2.78409e-10
	XPO5	1.35612	4.21256e-10
	AX746823	1.3562	0.000653787
	DHX37	1.35962	9.45424e-12
	NCAPD3	1.35993	3.88264e-09
	DTYMK	1.36104	4.68949e-08
	LOC100507463	1.36297	1.7378e-05
	TCF3	1.36303	8.83797e-10
	DDX21	1.36321	9.48583e-10
	ZNF239	1.36405	9.44342e-06
	LBX2	1.36443	0.00140421
	PKN3	1.36555	1.16846e-06
	OSMR	1.36613	1.96328e-06
	PRKDC	1.36651	6.4232e-08
	OAS2	1.36788	0.00116099
	GUCY1A2	1.36968	1.18129e-05
	FDPSP2	1.37035	0.000255429
	NMB	1.3712	2.44833e-06
	C19orf40	1.37125	9.88944e-09
	LAMA3	1.37232	0.00849236
	RPS6KL1	1.37326	6.33439e-06
	ANP32A-IT1	1.37416	1.97796e-05
	DUSP2	1.37508	0.0022518
	FLJ13224	1.37637	0.00618876
	CCNE2	1.37656	7.16452e-07
	MFHAS1	1.37757	3.14898e-07
	C20orf20	1.37817	1.65937e-11
	CENPN	1.37857	5.48727e-10
	PDGFB	1.37952	7.47519e-07
	ZNF485	1.37957	6.94386e-08
	RAB11FIP4	1.38015	0.00145083
	ITGA6	1.38039	5.34472e-05
	CHEK2	1.38041	1.15585e-07
	SPRY4	1.38045	6.98147e-06
	IRAK2	1.38046	1.08145e-06
	CD276	1.38057	4.97926e-08
	LCN12	1.38103	0.00798068
	CLCN2	1.38165	0.000201361
	SLC20A1	1.38215	9.3291e-08
	SNORA10	1.38246	3.84619e-05
	CBX4	1.38246	2.98952e-09
	C2orf27A	1.38276	0.000331181
	FUT4	1.38428	0.00043082
	LOC151534	1.38497	0.000887
	CDH24	1.38506	2.07568e-09
	GLT25D1	1.38522	9.49066e-13
	C16orf88	1.38702	1.59353e-11
	FZD2	1.38746	6.65402e-06
	AF339817	1.3886	0.00353262
	TMEM63A	1.38907	2.82176e-06
	PCNA-AS1	1.38964	7.44694e-07
	LEPRE1	1.3898	2.33883e-10
	NRARP	1.38998	1.44621e-05
	LRRC69	1.39007	0.00941162
	JPH1	1.39167	0.0014362
	PIGW	1.394	1.97993e-09
	VMO1	1.39543	0.000158271
	NOL6	1.39552	1.95068e-10
	KIF22	1.39685	1.40135e-10
	RTN4RL2	1.39877	1.34354e-06
	CHD7	1.3997	1.30421e-09
	PUS1	1.40008	9.49066e-13
	NCEH1	1.40215	2.27468e-05
	LRRC16A	1.40379	1.10868e-05
	KCNC3	1.40428	9.40409e-06
	RIPK2	1.40502	2.12713e-10
	RPL13AP20	1.40697	1.69665e-07
	FCN3	1.40701	4.79161e-05
	C14orf80	1.4084	9.69691e-07
	SLC2A1	1.40947	0.00111468
	MAP7	1.41303	0.00191024
	IRAK1	1.41348	1.22594e-08
	TMEM48	1.41402	7.59958e-09
	CCDC86	1.41412	3.41138e-13
	TMEM191A	1.41729	0.000882768
	BC038570	1.41784	0.00849236
	GREM1	1.41797	0.00542956
	INCENP	1.41847	2.81355e-07
	RAB3IP	1.41865	3.28237e-08
	MZT2B	1.41897	0.00938881
	EPSTI1	1.41924	0.000916557
	KCNG2	1.42007	0.00602732
	TRIM59	1.4203	2.21776e-08
	ITGA2	1.42039	0.000183812
	PCDH12	1.42143	5.0131e-06
	CCDC34	1.42215	1.07265e-07
	LOC729603	1.42259	0.00633154
	TOMM40	1.42283	1.61539e-10
	ANKRD13B	1.42361	4.61509e-05
	WDR34	1.4252	6.0834e-10
	CD72	1.42572	0.00224809
	TNFRSF10A	1.42665	9.50419e-06
	TMEM206	1.4272	2.40731e-10
	SLC6A6	1.42725	2.04249e-08
	BRCA1	1.42784	9.38777e-10
	CLCN5	1.42961	1.05237e-07
	SNORA40	1.43036	1.93359e-05
	PDCD11	1.43083	2.49972e-10
	PRR5-ARHGAP8	1.43292	2.26226e-05
	HECW1	1.43299	0.00391144
	METTL1	1.43364	2.75759e-12
	ECE2	1.43419	4.57372e-08
	AX747537	1.43453	2.9185e-05
	FXYD5	1.43462	5.05402e-06
	PUS7	1.43491	3.23775e-08
	KIAA1549	1.4357	2.33797e-05
	AGBL2	1.43592	0.00833509
	GRAMD2	1.43758	0.00400026
	TFAP4	1.43847	1.90159e-11
	PSRC1	1.44421	1.6145e-07
	AX747521	1.44588	0.000484291
	MCM8	1.44649	3.26662e-09
	LOC100506585	1.44679	0.00590799
	HSP90AB3P	1.44759	0.00202367
	RRP9	1.44823	1.32994e-11
	LYN	1.44896	6.27258e-05
	ITGB4	1.44983	0.000198745
	NFKBIE	1.45062	1.08145e-06
	MST1R	1.45336	0.00669865
	SIGLEC7	1.45388	0.00155314
	CHAF1B	1.45393	8.66902e-09
	MFSD12	1.4544	1.07447e-11
	NCAPD2	1.45443	2.77164e-10
	FLJ44511	1.45444	0.000666074
	CNKSR1	1.45446	0.00302046
	TRAIP	1.45498	9.22219e-08
	JUP	1.45582	0.00967878
	B3GNT4	1.4564	0.00422726
	BRI3BP	1.45712	0.000238103
	ALG1L	1.45918	4.89742e-06
	LOC340037	1.46096	0.000112145
	TP73	1.46164	0.00587982
	CPZ	1.46247	0.000311181
	RFWD3	1.46257	1.61963e-09
	SNORD79	1.46435	5.13504e-05
	CENPO	1.46481	2.69456e-15
	OSR2	1.46526	0.000605813
	AK123872	1.4658	5.71585e-05
	AF086288	1.4666	0.00353871
	HSD3B7	1.4673	3.68105e-07
	LOC100506660	1.46821	1.07277e-05
	TK1	1.46833	6.10549e-06
	CBX8	1.46854	3.61392e-08
	C4B	1.46911	0.00149819
	TNFRSF10B	1.46981	1.76133e-09
	FAM167B	1.47172	3.78591e-05
	WDR65	1.47294	0.00018355
	SPC24	1.47391	3.57789e-07
	TMEM201	1.47451	8.19074e-12
	STC1	1.47497	4.96732e-05
	RASSF7	1.47524	0.00447287
	UAP1L1	1.47634	1.5909e-09
	TAP1	1.47727	2.87036e-05
	SH3KBP1	1.4773	1.45634e-07
	BID	1.47791	6.52487e-08
	NID2	1.47876	0.000549403
	ZSWIM4	1.47899	1.67648e-06
	MSH5	1.47993	5.69242e-07
	KIF20B	1.4802	3.48103e-08
	RTN4R	1.48182	3.72865e-05
	LINC00346	1.48212	3.14787e-05
	LOC100132111	1.48219	0.000271956
	CSMD2	1.48225	0.000264021
	PCNA	1.48243	5.39522e-08
	TRAF2	1.48327	1.3421e-13
	PAFAH1B3	1.4833	2.51357e-06
	PASK	1.4833	1.67617e-07
	GATA3	1.48393	6.30227e-05
	IL2RA	1.48556	0.00135212
	CLCN4	1.48674	6.5898e-05
	HIST1H2BE	1.48677	0.00137661
	LOC100507156	1.48709	0.000334862
	LOC646851	1.48775	0.000244221
	URB2	1.48831	2.14142e-10
	SNORA6	1.48838	0.000251926
	PVRL1	1.48921	0.00351908
	AK298596	1.48957	1.10086e-07
	FAM203A	1.49033	6.80703e-08
	MMP14	1.49044	9.45424e-12
	MTHFD2	1.49134	7.54847e-08
	CHRNA5	1.49254	3.29785e-05
	ITGBL1	1.49259	0.00890558
	TCF7	1.4926	0.000376984
	OSCAR	1.49377	1.10763e-06
	ACRBP	1.4941	0.00112875
	STAMBPL1	1.49612	8.4991e-08
	H2AFX	1.4964	2.20197e-08
	PSAT1	1.49673	2.78648e-05
	CENPL	1.49721	7.793e-10
	SBK1	1.49847	0.00267437
	GPRIN3	1.49873	0.0038989
	GJA5	1.49911	8.86461e-08
	NLRC5	1.4992	2.22081e-05
	LOC100128881	1.49978	1.12034e-07
	SEMA7A	1.50207	0.00037139
	SKP2	1.50289	1.93062e-07
	TMC6	1.50298	1.04997e-05
	CKS1B	1.50344	2.01538e-09
	HPSE	1.50385	0.00024382
	HIST1H2BF	1.5065	0.0043346
	TP53I11	1.50657	2.77458e-07
	STK32C	1.50765	5.54987e-09
	BYSL	1.50794	4.11112e-12
	AK057681	1.50845	0.00846271
	IRF8	1.50961	0.00208998
	RASGEF1A	1.51156	0.00233943
	BX648270	1.51189	1.51882e-05
	TDRD6	1.5123	5.85716e-05
	TSPAN13	1.51261	0.000981838
	KNTC1	1.51393	1.77287e-08
	FEN1	1.51889	1.52881e-10
	SLC25A22	1.5206	1.15748e-07
	ARPC1B	1.52121	1.38943e-06
	AK127183	1.52171	0.000446188
	RBM12B-AS1	1.52237	2.51021e-07
	AMZ1	1.52569	0.00298663
	MSX1	1.52601	7.01968e-06
	TNFAIP2	1.52615	0.00016915
	GPR4	1.52653	1.34734e-07
	RNASEH2A	1.52677	7.41928e-08
	TOMM34	1.52696	3.87471e-10
	SULF2	1.52699	3.21269e-07
	C4B	1.5271	0.000456466
	LCK	1.52777	0.00812158
	ULBP3	1.52778	4.82006e-05
	FAR2	1.52841	4.16655e-05
	CCDC78	1.52873	7.57155e-05
	ISG15	1.52954	0.000636311
	AK090973	1.53141	0.0047515
	SNORD87	1.53191	0.00202106
	C15orf23	1.53267	5.52442e-09
	KCNJ14	1.53336	2.85602e-06
	ZSCAN12P1	1.53376	1.38091e-06
	LOC100507050	1.53395	0.000345061
	APLNR	1.535	3.32403e-05
	C2orf15	1.53567	0.000228947
	PPAT	1.53792	3.74461e-11
	CLN6	1.53795	3.39771e-10
	STAC3	1.538	5.03228e-08
	ATAD3B	1.53852	2.89005e-08
	SNX8	1.53876	4.80497e-13
	BCL11B	1.53922	0.000259313
	SNAI1	1.5398	2.89429e-06
	QSOX2	1.54212	2.13386e-11
	KIF21B	1.54321	0.000126556
	DKC1	1.54349	1.3421e-13
	SGK223	1.54375	2.52647e-05
	E2F3	1.54381	1.07447e-11
	ADAMTSL2	1.54403	1.0877e-05
	SAP25	1.54419	0.000277382
	SP6	1.545	0.00600797
	LOC641518	1.54551	4.15203e-05
	CDH11	1.54602	4.73571e-05
	KAL1	1.54608	4.52358e-05
	RAD54B	1.54745	1.76763e-08
	C17orf82	1.54775	8.71417e-05
	MLF1IP	1.548	6.41945e-08
	SPHK1	1.54948	1.79151e-05
[truncated: 1,604 more rows]

## Sheet: miRNA expression change
	Table S2. Multi-dimensional siganatures for gastric cancer (miRNA alteration).
	miRNA	Expression change (log2 fold)	Corrected P-value
	hsa-miR-139-3p	-1.74572	1.74e-10
	hsa-miR-1-3p	-2.94465	3.72e-10
	hsa-miR-139-5p	-1.68609	2.94e-09
	hsa-miR-133a-3p	-2.80061	2.94e-09
	hsa-miR-133b	-2.81567	1.02e-08
	hsa-miR-145-3p	-1.60786	1.17e-08
	hsa-miR-490-3p	-4.35336	3.3e-06
	hsa-miR-145-5p	-1.71746	4.12e-06
	hsa-miR-30a-3p	-1.17002	4.32e-06
	hsa-miR-490-5p	-2.81743	5.69e-06
	hsa-miR-143-3p	-1.23592	4.83e-05
	hsa-miR-30c-2-3p	-1.01485	6.46e-05
	hsa-miR-129-5p	-1.60137	0.000921331
	hsa-miR-9-3p	-1.53178	0.0014516
	hsa-miR-486-5p	-1.16991	0.00166725
	hsa-miR-137	-1.67682	0.00183616
	hsa-miR-204-5p	-1.7731	0.00215325
	hsa-miR-1258	-1.47927	0.00321662
	hsa-miR-383-5p	-1.84601	0.00452974
	hsa-miR-23c	-1.09743	0.00741458
	hsa-miR-196a-5p	6.17586	4.89e-16
	hsa-miR-21-5p	2.26661	1.32e-13
	hsa-miR-196b-5p	5.78955	1.95e-12
	hsa-miR-151a-3p	1.16155	1.74e-10
	hsa-miR-106b-5p	1.68743	8.94e-10
	hsa-miR-501-3p	2.28397	1.02e-09
	hsa-miR-335-3p	2.08284	1.04e-09
	hsa-miR-18a-5p	2.73665	2.94e-09
	hsa-miR-181a-3p	1.97105	3.1e-09
	hsa-miR-106b-3p	1.53205	3.1e-09
	hsa-miR-431-5p	2.7941	3.53e-09
	hsa-miR-146b-5p	2.44299	3.53e-09
	hsa-miR-188-5p	2.77142	4.3e-09
	hsa-miR-25-5p	2.66366	4.49e-09
	hsa-miR-589-5p	1.36156	4.68e-09
	hsa-miR-1307-3p	1.83358	7.18e-09
	hsa-miR-3127-5p	2.11597	7.18e-09
	hsa-miR-500a-3p	1.82654	9.96e-09
	hsa-miR-135b-5p	4.39152	1.34e-08
	hsa-miR-181a-5p	1.42676	1.39e-08
	hsa-miR-25-3p	1.30398	1.48e-08
	hsa-miR-181b-5p	1.61429	1.62e-08
	hsa-miR-185-5p	1.29533	2.07e-08
	hsa-miR-17-3p	1.45261	2.72e-08
	hsa-miR-877-5p	2.43474	2.8e-08
	hsa-miR-532-5p	1.44744	2.95e-08
	hsa-miR-146b-3p	2.26581	2.95e-08
	hsa-miR-135b-3p	2.86999	4.06e-08
	hsa-miR-592	3.25344	6.68e-08
	hsa-miR-17-5p	1.64027	9.43e-08
	hsa-miR-15b-5p	1.26011	1.32e-07
	hsa-miR-92a-1-5p	2.32394	1.41e-07
	hsa-miR-18a-3p	2.72081	2.27e-07
	hsa-miR-93-5p	1.5265	2.45e-07
	hsa-miR-185-3p	2.01625	4.2e-07
	hsa-miR-501-5p	2.38489	4.47e-07
	hsa-miR-196b-3p	1.75107	4.66e-07
	hsa-miR-15a-5p	1.32546	5.75e-07
	hsa-miR-19b-1-5p	1.87577	5.91e-07
	hsa-miR-421	1.51136	5.95e-07
	hsa-miR-937-3p	2.41956	6.76e-07
	hsa-miR-103a-3p	1.01954	6.76e-07
	hsa-miR-615-3p	2.97373	6.78e-07
	hsa-let-7f-1-3p	1.45296	7.13e-07
	hsa-miR-130b-3p	2.33679	1.08e-06
	hsa-miR-502-3p	1.51303	1.33e-06
	hsa-miR-542-3p	1.38112	1.52e-06
	hsa-miR-21-3p	2.33038	1.54e-06
	hsa-miR-7-5p	2.78182	1.84e-06
	hsa-miR-19a-3p	1.95009	1.86e-06
	hsa-miR-16-1-3p	1.81013	1.87e-06
	hsa-miR-183-5p	3.16991	1.9e-06
	hsa-miR-548f-3p	2.34028	1.91e-06
	hsa-miR-3613-5p	1.9528	2.29e-06
	hsa-miR-20a-5p	1.39252	2.33e-06
	hsa-miR-96-5p	3.26971	2.45e-06
	hsa-miR-652-3p	1.64114	2.45e-06
	hsa-miR-92a-3p	1.1604	2.45e-06
	hsa-miR-550a-5p	2.05881	2.45e-06
	hsa-miR-708-5p	1.95374	2.74e-06
	hsa-miR-639	1.90197	3.27e-06
	hsa-miR-3682-3p	1.96784	4.12e-06
	hsa-miR-34c-5p	1.73264	4.12e-06
	hsa-miR-660-5p	1.37861	4.42e-06
	hsa-miR-3677-3p	2.22661	4.42e-06
	hsa-miR-212-3p	1.39155	4.42e-06
	hsa-miR-141-5p	3.47795	4.42e-06
	hsa-miR-671-5p	1.98813	5.35e-06
	hsa-miR-1301-3p	1.76135	5.92e-06
	hsa-miR-362-3p	2.14111	5.92e-06
	hsa-miR-200a-5p	3.57204	6.3e-06
	hsa-miR-19b-3p	1.43481	7.62e-06
	hsa-miR-222-3p	2.16419	7.95e-06
	hsa-miR-502-5p	2.148	9.14e-06
	hsa-miR-320b	1.69204	9.82e-06
	hsa-miR-182-5p	2.65928	9.82e-06
	hsa-miR-1254	2.02358	1.68e-05
	hsa-miR-200b-3p	3.38621	1.71e-05
	hsa-miR-552-3p	3.37122	1.99e-05
	hsa-miR-151a-5p	1.15768	2.06e-05
	hsa-miR-651-5p	1.71192	2.06e-05
	hsa-miR-590-3p	1.83022	2.08e-05
	hsa-miR-493-5p	1.38889	2.1e-05
	hsa-miR-425-5p	1.83447	2.1e-05
	hsa-miR-500a-5p	1.77828	2.1e-05
	hsa-miR-1266-5p	2.29821	2.1e-05
	hsa-miR-130b-5p	2.61068	2.1e-05
	hsa-miR-500b-5p	1.77563	2.14e-05
	hsa-miR-424-3p	2.02254	2.25e-05
	hsa-miR-3687	2.0654	2.4e-05
	hsa-miR-183-3p	2.11398	2.46e-05
	hsa-miR-301b-3p	2.18164	2.48e-05
	hsa-miR-769-3p	1.64133	2.7e-05
	hsa-miR-222-5p	2.27569	2.81e-05
	hsa-miR-532-3p	1.96504	2.82e-05
	hsa-miR-32-3p	1.94633	2.82e-05
	hsa-miR-450b-5p	1.60061	2.85e-05
	hsa-miR-1292-5p	1.73177	2.94e-05
	hsa-miR-708-3p	1.50752	2.94e-05
	hsa-miR-3662	1.75812	2.95e-05
	hsa-miR-200a-3p	3.42879	3.05e-05
	hsa-miR-15b-3p	1.69383	3.14e-05
	hsa-miR-32-5p	1.55163	3.31e-05
	hsa-miR-509-3p	2.56437	3.31e-05
	hsa-miR-301a-3p	1.41413	3.32e-05
	hsa-miR-550a-3p	2.17168	3.81e-05
	hsa-miR-200b-5p	3.53956	3.86e-05
	hsa-miR-1976	2.03973	4.07e-05
	hsa-miR-584-5p	1.53889	4.09e-05
	hsa-miR-200c-3p	2.99745	4.37e-05
	hsa-miR-454-3p	1.21077	4.83e-05
	hsa-miR-191-5p	1.49582	4.85e-05
	hsa-miR-221-3p	1.71657	4.85e-05
	hsa-miR-362-5p	1.52238	5.46e-05
	hsa-miR-493-3p	1.60016	5.67e-05
	hsa-miR-194-5p	3.02746	6.62e-05
	hsa-miR-573	1.54623	7.34e-05
	hsa-miR-93-3p	1.4995	7.42e-05
	hsa-miR-556-3p	1.77266	7.6e-05
	hsa-miR-548e-3p	1.53173	8.37e-05
	hsa-miR-429	3.69872	8.39e-05
	hsa-miR-935	2.34314	8.39e-05
	hsa-miR-942-5p	1.62865	8.86e-05
	hsa-miR-330-5p	1.44209	8.97e-05
	hsa-miR-3176	1.67818	9.12e-05
	hsa-miR-1249-3p	1.48755	0.000100645
	hsa-miR-576-5p	1.25913	0.000108522
	hsa-miR-148b-5p	1.88636	0.000108522
	hsa-miR-141-3p	3.18828	0.000109745
	hsa-miR-503-5p	2.18899	0.000112289
	hsa-miR-29a-5p	1.31503	0.000128069
	hsa-miR-548d-3p	1.66609	0.000132666
	hsa-miR-940	1.92271	0.000132666
	hsa-miR-590-5p	1.5066	0.000133668
	hsa-miR-629-5p	1.05427	0.000146769
	hsa-miR-103a-2-5p	1.92411	0.000146769
	hsa-miR-200c-5p	2.99985	0.000157204
	hsa-miR-3648	2.1001	0.000162524
	hsa-miR-33b-3p	1.68316	0.000164397
	hsa-miR-423-3p	1.12821	0.000166761
	hsa-miR-3934-5p	1.68356	0.000192718
	hsa-miR-424-5p	1.84626	0.000192718
	hsa-miR-22-5p	1.32205	0.000208477
	hsa-miR-7-1-3p	1.45823	0.000247935
	hsa-miR-1306-3p	1.51914	0.000276697
	hsa-miR-192-5p	3.04184	0.000277275
	hsa-miR-194-3p	3.35739	0.000284673
	hsa-miR-95-3p	1.7189	0.000286541
	hsa-miR-154-3p	1.36553	0.000298076
	hsa-miR-339-3p	1.05428	0.00034598
	hsa-miR-3653-3p	1.85228	0.000359707
	hsa-miR-192-3p	3.29272	0.000373638
	hsa-miR-3174	1.19463	0.000395838
	hsa-miR-16-5p	1.26029	0.000409342
	hsa-miR-625-5p	1.86212	0.000409342
	hsa-miR-760	1.5088	0.000423153
	hsa-miR-335-5p	1.09143	0.000444588
	hsa-miR-3614-5p	2.00252	0.000497571
	hsa-miR-16-2-3p	1.74649	0.000567605
	hsa-miR-92b-5p	1.43486	0.000571927
	hsa-miR-223-3p	1.38647	0.000593337
	hsa-miR-142-5p	2.03088	0.000623509
	hsa-miR-1269a	3.56613	0.000664231
	hsa-miR-216a-5p	1.73521	0.000737312
	hsa-miR-345-5p	2.02091	0.000794837
	hsa-miR-24-2-5p	1.36072	0.00080249
	hsa-miR-1228-5p	1.37254	0.000854625
	hsa-miR-148b-3p	1.03104	0.000921331
	hsa-miR-3200-3p	1.52794	0.000930779
	hsa-miR-3944-3p	1.40664	0.00107767
	hsa-miR-629-3p	1.81708	0.00109624
	hsa-miR-217	1.59422	0.00113701
	hsa-miR-34a-3p	1.60305	0.00113701
	hsa-miR-214-3p	1.25288	0.0011578
	hsa-miR-3684	1.07415	0.00118437
	hsa-miR-33b-5p	2.29255	0.00119135
	hsa-miR-34a-5p	1.03048	0.00120158
	hsa-miR-505-3p	1.27573	0.0013649
	hsa-miR-29b-1-5p	1.57398	0.00139881
	hsa-miR-20a-3p	1.71462	0.00139881
	hsa-miR-2116-3p	1.34607	0.0014516
	hsa-miR-3651	2.07531	0.00149208
	hsa-miR-331-3p	1.21549	0.00151826
	hsa-miR-548k	1.11561	0.00153771
	hsa-miR-3189-3p	1.26766	0.00155751
	hsa-miR-33a-3p	1.27537	0.00156774
	hsa-miR-450a-5p	1.65805	0.00156774
	hsa-miR-155-5p	1.67547	0.00164456
	hsa-miR-1229-3p	1.48977	0.00166725
	hsa-miR-643	1.18377	0.00183175
	hsa-miR-15a-3p	1.22377	0.00183175
	hsa-miR-589-3p	1.26689	0.00184831
	hsa-miR-155-3p	1.65388	0.00184831
	hsa-miR-369-3p	1.01993	0.00187601
	hsa-miR-551a	1.4618	0.00193353
	hsa-miR-188-3p	1.61575	0.00204372
	hsa-miR-3690	1.32067	0.00210388
	hsa-miR-142-3p	2.33373	0.00231216
	hsa-miR-3615	1.20566	0.00236263
	hsa-miR-454-5p	1.29725	0.00239318
	hsa-miR-147b	2.12538	0.00243644
	hsa-miR-514a-3p	1.43434	0.00247182
	hsa-miR-455-3p	1.46599	0.00247657
	hsa-miR-1228-3p	1.35404	0.00253447
	hsa-miR-215-5p	2.79242	0.00262877
	hsa-miR-342-5p	1.3232	0.00264594
	hsa-miR-653-5p	1.24544	0.00283421
	hsa-miR-508-3p	1.64855	0.00299992
	hsa-miR-505-5p	1.24361	0.0033114
	hsa-miR-489-3p	1.20929	0.00361309
	hsa-miR-487a-3p	1.27845	0.00369546
	hsa-let-7a-3p	1.02455	0.00403361
	hsa-miR-219a-5p	1.37681	0.00429832
	hsa-miR-132-5p	1.16494	0.00449465
	hsa-miR-655-3p	1.01027	0.00458336
	hsa-miR-1276	1.11915	0.00480387
	hsa-miR-577	2.6202	0.0048866
	hsa-miR-221-5p	1.51794	0.00594341
	hsa-miR-663a	1.04134	0.00595761
	hsa-miR-191-3p	1.34542	0.00618659
	hsa-miR-939-5p	1.0945	0.00622121
	hsa-miR-18b-5p	1.33887	0.00642631
	hsa-miR-330-3p	1.1557	0.00665323
	hsa-miR-376b-3p	1.35134	0.00667008
	hsa-miR-548s	1.16731	0.00690813
	hsa-let-7f-2-3p	1.42062	0.00720217
	hsa-miR-3614-3p	1.38972	0.00730245
	hsa-miR-4326	1.979	0.0076202
	hsa-miR-548o-3p	1.05908	0.00860505
	hsa-miR-3117-3p	1.20521	0.00935087
	hsa-miR-184	1.88675	0.00957089

## Sheet: methylation change
	Table S2. Multi-dimensional siganatures for gastric cancer (methylation alteration).
	Gene Symbol	methylation change (log2 fold)	Corrected P-value
	FLJ20628	-3.37526	1.88e-10
	RBM10	-3.08966	1.94e-07
	HS3ST1	-3.06715	1.08e-10
	PAICS	-3.03819	7.27e-11
	CST3	-2.95403	5.94e-14
	BCL11B	-2.9269	1.31e-09
	ATP6V0A2	-2.84533	2.49e-08
	PFC	-2.84393	1.57e-07
	NHLH2	-2.84148	1.25e-08
	C21orf124	-2.83602	4.04e-12
	MATN3	-2.75826	2.97e-08
	BRPF1	-2.73619	1.42e-09
	YAP1	-2.73197	8.38e-11
	C1orf101	-2.71689	1.51e-10
	WRN	-2.67921	4.28e-10
	ACE	-2.6603	2.7e-06
	AMH	-2.62792	7.03e-08
	CTSL2	-2.59786	1.29e-09
	CSTB	-2.58727	4.05e-09
	CNTD	-2.58149	9.09e-06
	PLA2G2F	-2.57905	6.23e-06
	TPPP	-2.55797	4.1e-06
	ABCC3	-2.55769	2.21e-10
	KIAA1893	-2.54694	5.92e-08
	POLR3E	-2.50644	7.69e-08
	ZNF282	-2.5002	4.03e-06
	PCSK6	-2.47307	2.49e-11
	GABARAPL2	-2.4289	5.04e-09
	PKP2	-2.39586	1.08e-10
	CCAR1	-2.37852	1.41e-05
	FSCN1	-2.36997	7.7e-10
	ABCF2	-2.36978	1.89e-07
	C6orf152	-2.35336	5.76e-12
	SRXN1	-2.34193	3.96e-08
	GPRC5C	-2.33703	8e-10
	LAIR1	-2.33097	3.37e-09
	DSC2	-2.32755	4.95e-09
	TMLHE	-2.28767	3.93e-05
	DNAH10	-2.28244	4.27e-10
	SH3BP4	-2.28156	1.31e-13
	MGC33486	-2.25544	1.09e-09
	ACTN1	-2.24137	3.3e-06
	PLXND1	-2.23176	7.77e-05
	CTGF	-2.23111	3.05e-09
	FRMD5	-2.18391	1.95e-10
	BARX2	-2.1819	5.93e-09
	EPHX2	-2.15679	3.51e-08
	LIPG	-2.15472	8.19e-10
	ASPSCR1	-2.15427	6.98e-05
	PVRL2	-2.1426	2.75e-10
	SLC16A12	-2.13766	8.38e-11
	RSPO1	-2.13536	1.38e-06
	WDR64	-2.13125	4.6e-06
	KRTHA6	-2.12069	7.15e-11
	GALNT14	-2.11001	4.33e-06
	KSP37	-2.10954	3.78e-10
	SLC26A5	-2.10212	2.03e-08
	CHCHD6	-2.09439	3.72e-10
	KRTHA5	-2.09003	2.49e-10
	LOC339524	-2.08488	2.12e-08
	KRTAP13-4	-2.06158	5.6e-07
	DLG1	-2.06115	8.6e-10
	ALOX5AP	-2.03876	1.29e-06
	EFNB2	-2.03158	1.62e-08
	GYG2	-2.02828	8.38e-11
	STK40	-2.0275	9.36e-09
	MYC	-2.01801	5.76e-12
	SLC16A5	-2.01431	5.71e-07
	DST	-2.01399	9.85e-08
	ZNF552	-2.01005	0.00756088
	C6orf136	-2.00152	4.32e-08
	AYTL1	-1.99123	3.53e-08
	FN3K	-1.98365	4.95e-06
	TEAD4	-1.98159	5.09e-10
	RGL2	-1.975	1.12e-08
	IGFBP4	-1.97155	1.69e-05
	EREG	-1.96683	9.69e-11
	KLHL22	-1.96552	3.53e-10
	C17orf80	-1.9608	4.51e-10
	PDIA5	-1.94626	2.51e-07
	FAM3B	-1.94497	0.000257534
	FYCO1	-1.94043	3.37e-09
	DUSP8	-1.93717	3.17e-08
	SLC13A2	-1.93214	4.54e-09
	DGKH	-1.92526	4.47e-11
	HAS3	-1.91988	3.54e-05
	CAPZA1	-1.91785	6.43e-06
	AZGP1	-1.91585	1.36e-08
	CDC25B	-1.91499	2.9e-06
	ITSN2	-1.91132	3.44e-06
	PRSS12	-1.9105	3.15e-07
	ARSD	-1.90958	2.89e-08
	HOXA13	-1.90942	2.18e-09
	EFNA5	-1.89929	1.88e-06
	PARD6G	-1.88984	1.16e-05
	ZNF408	-1.88714	3.9e-05
	TMOD2	-1.88706	1.09e-09
	STX3A	-1.88695	6.49e-06
	C14orf130	-1.87899	2.48e-10
	PDGFC	-1.87885	5.44e-05
	EPHB2	-1.87728	8.29e-06
	ZNF670	-1.87698	7.15e-11
	MCM2	-1.87506	4.31e-06
	IPF1	-1.87489	3.78e-10
	NDFIP1	-1.87325	5.56e-09
	CASP1	-1.8678	0.00105036
	MOSC2	-1.86114	1.01e-08
	MAGI1	-1.85579	3.57e-09
	CNN3	-1.83863	9.69e-11
	CLDN1	-1.83582	3.23e-09
	TMEM19	-1.82085	0.000198072
	ERCC6	-1.81918	3.72e-05
	BSCL2	-1.81607	4.33e-08
	WNT8B	-1.81123	2.03e-08
	GPR39	-1.81101	2.54e-11
	FLJ32745	-1.80911	1.08e-10
	TNFRSF4	-1.80779	5.92e-06
	LGR6	-1.80478	0.000754521
	FLJ37549	-1.80068	8.38e-11
	PAX3	-1.7955	0.000165449
	MICA	-1.7849	2.21e-10
	TMPRSS2	-1.78458	7.55e-09
	MTAP	-1.7829	3.39e-05
	B4GALNT3	-1.78124	2.1e-07
	EIF3S6	-1.77177	9.32e-05
	C2orf11	-1.7705	1.09e-09
	CMYA1	-1.75479	3.59e-05
	C10orf56	-1.75348	1.89e-07
	SCYL1	-1.75186	2.68e-10
	MAP2K7	-1.74666	1.13e-08
	KIAA1018	-1.73808	4.98e-05
	SYT12	-1.73713	1.32e-07
	WNK2	-1.72881	1.51e-06
	KDELR3	-1.72663	3.84e-08
	C20orf6	-1.72618	2.75e-11
	MMS19L	-1.72495	2.69e-09
	CRY1	-1.72223	3.53e-10
	NR1I3	-1.71806	1.26e-05
	GSTM3	-1.70223	0.0044024
	BACE1	-1.70097	5.96e-08
	STT3B	-1.68069	0.000207542
	SH3BGRL2	-1.67039	8.99e-10
	GPR32	-1.67008	1.26e-08
	ETF1	-1.66719	9.36e-09
	SYNJ2BP	-1.65704	4.04e-12
	MYCN	-1.65539	5.13e-05
	NTNG2	-1.65449	0.00116944
	LTBP4	-1.65361	3.49e-05
	FOXE3	-1.65144	2.89e-05
	CRR9	-1.645	0.00148271
	KIAA1468	-1.63545	2.35e-05
	CD276	-1.62575	7.17e-06
	USH1C	-1.62371	2.96e-07
	OMA1	-1.62214	6.67e-08
	APOC3	-1.62197	5.32e-05
	PIAS1	-1.62078	5.76e-12
	PDIA2	-1.61476	3.29e-05
	RDH8	-1.61131	4.29e-05
	DHCR24	-1.60796	1.12e-08
	C14orf108	-1.60417	3.68e-07
	TFRC	-1.60131	0.000656366
	ZNF434	-1.59659	1.93e-05
	KCNJ3	-1.59583	6.42e-06
	C9orf42	-1.59413	2.3e-06
	LIN7C	-1.59398	7.34e-05
	TAS2R7	-1.58632	0.00615492
	TNFAIP3	-1.58498	6.36e-07
	MGC16372	-1.5824	0.000149004
	ONECUT2	-1.58044	6.54e-07
	PTPRK	-1.57277	2.48e-07
	CBR3	-1.57276	1.6e-05
	C12orf60	-1.56468	6.09e-08
	PPM1B	-1.56318	1.92e-10
	TOR2A	-1.56124	1.08e-10
	CBR1	-1.56093	2.27e-06
	TPTE2	-1.55688	4.46e-06
	HABP4	-1.55458	1.18e-07
	MAGI2	-1.55457	9.64e-11
	TYMS	-1.55358	1.13e-10
	YWHAG	-1.53889	1.84e-10
	THEX1	-1.53718	7.3e-09
	PRKCZ	-1.53538	7.06e-05
	MMP27	-1.53263	0.000167079
	GTF2A2	-1.52997	1.11e-05
	TMEM51	-1.52295	2.18e-08
	MKRN2	-1.52251	0.000892184
	SPAG6	-1.52115	0.000125469
	KLF4	-1.51717	6e-11
	SCAMP2	-1.51655	1.92e-06
	C4orf9	-1.51209	0.00533906
	MLF1IP	-1.51053	6.86e-05
	ERAS	-1.50914	3.46e-07
	HGF	-1.50913	5.43e-07
	GALNT11	-1.50811	6.56e-05
	BMP2	-1.50729	1.2e-08
	CPVL	-1.50651	0.00257441
	FKSG2	-1.4972	0.00025137
	FOXA2	-1.49649	4.8e-07
	PARVA	-1.49568	1.31e-07
	PSMB8	-1.49352	1.31e-08
	CDX2	-1.49155	0.000853499
	SLC12A7	-1.49058	4.32e-06
	UBXD3	-1.48884	0.000239334
	MEN1	-1.48744	1.88e-06
	CXCL1	-1.4811	1.82e-06
	PTK2	-1.48086	1.26e-06
	KCNE1	-1.47928	2.02e-05
	THYN1	-1.47928	0.00010292
	C12orf46	-1.47607	4.59e-10
	MAPK6	-1.47498	1.12e-08
	SLC25A11	-1.47023	0.000118357
	ARF1	-1.46802	2.22e-05
	FBXO7	-1.46568	0.000120354
	CCNJ	-1.46557	0.000984595
	MT1E	-1.46174	0.00921682
	ANKRD43	-1.45954	0.000119742
	EYA2	-1.4556	5.24e-06
	CIT	-1.44746	1.89e-09
	EMX1	-1.44739	3.97e-05
	LAT2	-1.44732	0.000866635
	FLJ90834	-1.4464	0.000223266
	C10orf47	-1.4436	0.00296246
	FXYD4	-1.43994	7.38e-07
	FANCC	-1.43498	4.28e-06
	C21orf99	-1.43193	1.21e-05
	SMAD7	-1.43067	3.84e-05
	FLJ23577	-1.43025	0.00639871
	GTF2H2	-1.42979	1.86e-05
	MYL2	-1.42764	0.00112783
	CCR1	-1.42383	8.56e-06
	CYP8B1	-1.42311	4.41e-07
	GIMAP1	-1.42036	6.94e-05
	TNFRSF1B	-1.41813	0.000109731
	KCNH8	-1.41589	9.61e-06
	RRAGB	-1.41553	0.000679219
	P2RY11	-1.41523	7.3e-09
	YBX2	-1.41073	0.000358213
	PITX3	-1.40308	0.000348956
	TFAP2C	-1.40191	0.000837161
	CRYGC	-1.39859	0.00713867
	IGFBP2	-1.39827	0.000402206
	GAS2L3	-1.39679	0.00091357
	GPR176	-1.39544	8.13e-06
	CPT2	-1.39275	4.08e-08
	ADAMTS3	-1.39067	6.07e-06
	HAX1	-1.38992	3.59e-05
	RUNDC2A	-1.38962	0.000313335
	ALG12	-1.38299	7.15e-11
	TLK1	-1.37419	7.31e-06
	DSP	-1.37313	2.12e-05
	ZFP2	-1.37216	3e-10
	MRPL44	-1.37164	8.99e-10
	PHACTR4	-1.37133	0.000802535
	GPAA1	-1.36661	0.000654099
	ARID3A	-1.365	2.22e-05
	NADSYN1	-1.36455	0.000205593
	CUTL1	-1.36348	8.15e-08
	PPP1R1A	-1.36243	2.17e-05
	AASS	-1.36228	1.41e-06
	ITPA	-1.36208	2.54e-11
	SCFD1	-1.36156	1.15e-08
	SMCX	-1.35855	0.000782363
	NUSAP1	-1.35819	8.04e-05
	TIMP2	-1.35767	0.00344052
	MGAT5	-1.35176	0.000105876
	CLOCK	-1.35106	7.57e-05
	UTP20	-1.34599	0.000231479
	CEP68	-1.33798	3.94e-05
	TSPAN9	-1.33624	0.000884069
	FAM105A	-1.3359	0.00116944
	RANBP2	-1.33099	0.000164285
	C9orf84	-1.32985	0.00130404
	RHOB	-1.32558	0.00059331
	PER1	-1.32341	0.00815725
	OCLN	-1.32173	2.73e-07
	GORASP2	-1.31259	7.36e-08
	GRIK4	-1.3052	3.82e-06
	CD1B	-1.30102	1.34e-06
	C21orf63	-1.29959	3.5e-05
	ZNF696	-1.29781	0.00026211
	PDE8A	-1.29716	0.000306556
	SH3YL1	-1.28536	0.000206102
	EPHB3	-1.2825	2.15e-05
	GJB2	-1.28234	0.000284484
	KAL1	-1.28169	9.57e-05
	CPZ	-1.28139	0.00493569
	CRYZ	-1.28098	0.00621551
	CYFIP1	-1.27133	2.35e-07
	LRRC8E	-1.2686	2.06e-06
	BTBD11	-1.26851	0.0081688
	42434	-1.26656	3.02e-05
	PTPRZ1	-1.26623	0.00350544
	C14orf156	-1.2595	0.000168605
	DDX28	-1.25836	0.00949278
	SLC33A1	-1.25833	1.51e-06
	MSX2	-1.25256	1.06e-09
	ADAM17	-1.25215	0.000638093
	SKIP	-1.25041	7.2e-08
	IFNGR1	-1.24787	4.05e-09
	ERBB3	-1.24731	5.4e-07
	SP8	-1.24641	0.00296074
	LEF1	-1.2441	0.000979521
	FLJ20699	-1.24409	0.000306556
	SMS	-1.23879	6.05e-05
	FLJ21062	-1.23729	9.21e-06
	BBC3	-1.23447	1.06e-06
	SHOX2	-1.23214	0.000419218
	PRAF1	-1.21449	7.4e-05
	LILRA2	-1.20833	8.85e-06
	GAST	-1.20706	0.000299954
	NUP107	-1.20679	7.74e-08
	UBE2V2	-1.20638	0.000144428
	USP6NL	-1.20484	8.6e-10
	ACHE	-1.20247	0.00770246
	LRRTM3	-1.20093	0.000959168
	KCNE3	-1.19745	0.000372947
	B3GNT5	-1.19707	0.00619988
	STEAP2	-1.19672	0.000486693
	SDC1	-1.19629	2.32e-07
	CRABP2	-1.19246	0.0016315
	GRHL3	-1.19219	1.54e-06
	CXorf26	-1.19047	0.00108645
	NTRK3	-1.18884	0.000285022
	ERCC5	-1.18756	2.44e-10
	STAC3	-1.1871	0.00104901
	TRIM8	-1.18705	2.81e-06
	VTCN1	-1.18687	1.14e-07
	AP4M1	-1.18232	5.96e-05
	FOXO3A	-1.17176	0.00316813
	PTPRE	-1.16452	1.93e-07
	HIST4H4	-1.16363	0.000282834
	SSTR1	-1.15815	3.8e-07
	TRIM62	-1.15702	0.000347084
	CHRDL2	-1.15653	3.04e-05
	ZNF219	-1.15468	4.65e-05
	LGALS12	-1.1501	0.00141244
	ABI1	-1.14963	0.00434688
	PHB	-1.14904	3.69e-05
	TTR	-1.14286	6.92e-05
	FLJ33860	-1.14199	0.000563547
	HLX1	-1.14045	0.000259392
	M160	-1.13538	0.00391278
	ZNF239	-1.13292	0.00134574
	CBX4	-1.13021	8.93e-05
	C1orf90	-1.12731	3.19e-05
	TFEB	-1.12512	6.05e-05
	GSG1	-1.11832	0.0037786
	EXOC6	-1.11779	7.27e-05
	CTSL	-1.11747	0.000358213
	TNFSF13B	-1.11677	0.00680257
	SIX1	-1.11518	0.00771967
	GTF3C4	-1.11232	0.000138203
	BTC	-1.11185	6.05e-05
	FNDC6	-1.10984	0.0028317
	GCH1	-1.10817	3.11e-05
	EYA3	-1.1028	7.99e-08
	SRGAP1	-1.10179	4.17e-07
	RUSC2	-1.10174	0.00306133
	FOXH1	-1.10035	4.08e-06
	BAZ2A	-1.09786	7.22e-05
	ADAMTS15	-1.09616	0.00134093
	PRKDC	-1.09541	4.98e-06
	ITGA10	-1.09403	1.2e-08
	ORAOV1	-1.08954	2.74e-05
	GP5	-1.08717	7.3e-05
	SULT4A1	-1.0866	0.000309755
	CXADR	-1.08514	3.74e-05
	ZCCHC14	-1.085	0.000638093
	SHMT1	-1.08253	2.46e-05
	ZNF398	-1.06979	0.0018078
	C17orf39	-1.06735	5.04e-05
	ITGB3BP	-1.06578	2.77e-05
	FLJ36888	-1.06435	4.64e-05
	PHACS	-1.06358	2.81e-06
	SH3GLB2	-1.06247	1.93e-06
	EHD2	-1.06184	0.00171075
	PEX11A	-1.05418	1.29e-05
	SNX17	-1.04961	1.31e-07
	NKX2-8	-1.04917	0.000848689
	MYRIP	-1.0476	0.00307627
	NMU	-1.04364	0.000684447
	GAJ	-1.04348	0.00766736
	HMBOX1	-1.04333	0.00209667
	NGEF	-1.04104	0.000669322
	GPR125	-1.03864	4.41e-05
	ATP6V0D1	-1.03642	0.00491632
	RAI14	-1.0353	0.000358213
	MRPL33	-1.03358	0.00810014
	KRTCAP2	-1.02653	7.4e-05
	SEPP1	-1.0258	0.000450444
	OTOP2	-1.02307	2.16e-05
	KIAA1838	-1.01988	1.82e-06
	TAS2R10	-1.01858	0.000722648
	RASSF6	-1.01382	0.0019904
	MGC3731	-1.01378	5.78e-07
	ZNF566	-1.01034	3.67e-05
	IL1RN	-1.0103	0.00243427
	CDCP1	-1.00528	9.39e-07
	IFNW1	1.00177	0.00713379
	DKK2	1.00786	0.0019965
	KHDRBS2	1.00829	0.000754521
	MGC35043	1.01118	0.000670158
	PIGX	1.01348	0.00356913
	EPB41	1.01431	0.00736062
	CPT1C	1.02141	0.00820827
	CHL1	1.02181	0.00387153
	PPARGC1B	1.02716	0.00718619
	GPSM3	1.02771	0.00830878
	CTSW	1.03148	0.000870838
	C13orf10	1.03369	0.00716416
	CHD1L	1.04218	0.00121318
	ACOX2	1.04243	0.00486937
	FLJ45983	1.05108	0.000402206
	NNMT	1.05609	0.00134858
	PCGF6	1.06347	0.00143614
	C8orf13	1.06358	0.00789489
	TPT1	1.06399	0.00721476
	ZNF285	1.0667	4.33e-06
	TCTEX1D1	1.06781	6.07e-09
	BTBD5	1.07051	0.00291383
	ZNF10	1.07138	0.000147139
	CPXM2	1.07481	3.96e-08
	ARMC3	1.07584	0.00525979
	SLC9A3R2	1.07585	1.09e-05
	C1orf172	1.07835	0.000996595
	CSPG2	1.07865	0.000286773
	PTD015	1.08474	0.00491133
	CCDC8	1.09043	0.00490278
	TSSK2	1.09179	3.21e-05
	ADRBK2	1.09311	3.97e-05
	ZNF215	1.09369	0.00707293
	FLJ10260	1.09549	0.00135305
	GNG10	1.09655	0.000143019
	KCNK12	1.09756	7.03e-05
	OSBPL8	1.10621	0.00646659
	FLJ31659	1.10742	0.0031046
	MRGPRX2	1.1166	0.00159401
	REEP2	1.11881	0.000126044
	NDUFC1	1.12175	0.000343508
	OXTR	1.12222	9.87e-06
	SURF2	1.12669	0.00876146
	ENTPD6	1.12671	2.31e-07
	TATDN2	1.13091	2e-08
	DENND3	1.13534	0.00505508
	SYT4	1.13595	1.62e-05
	C20orf52	1.13778	0.00852782
	HOXB5	1.13829	0.000127773
	SYNPO	1.14979	0.00185069
	MAGI3	1.14986	0.0058684
	C10orf10	1.15633	1.57e-05
	SAMD7	1.1585	2.1e-07
	TMEM130	1.15935	9.4e-06
	C20orf14	1.16048	3.05e-09
	LAP3	1.16078	0.00525682
	HIST1H4K	1.16144	0.000188736
	STIM2	1.16519	2.35e-05
	PLOD1	1.18657	0.00632662
	UBE3A	1.18968	6.29e-09
	FLJ20010	1.19437	0.0003559
	E2F4	1.19972	4.54e-05
	LRRIQ2	1.20163	0.000134238
	DSCR1	1.20922	4.28e-06
	PRMT1	1.21107	4.7e-07
	BAG3	1.21146	0.00408777
	CDC23	1.21723	5.44e-05
	LOC400696	1.22072	0.00206091
	PCBP2	1.22198	0.00788652
	PSMB10	1.22274	0.00292049
	LCN12	1.22444	8.88e-05
	HTR7	1.23354	0.00136645
	PDE6G	1.24581	1.22e-05
	FLOT2	1.2474	4.39e-08
	PEX5L	1.24903	0.000369519
	FLJ40125	1.25128	0.00904954
	GNAO1	1.2619	0.00161229
	FLJ20364	1.26291	0.00812577
	MGC40579	1.26896	0.00549153
	TSPAN5	1.27189	0.00203851
	ARAF	1.27317	0.000372947
	POLR2G	1.27482	6.36e-06
	LDHB	1.28117	0.00862587
	C3orf26	1.28543	2.23e-09
	LOC387758	1.28717	2.21e-07
	RAB11FIP5	1.2902	0.00194137
	LYST	1.29312	0.000120052
	ECHS1	1.29794	0.000204599
	MGC5297	1.30066	0.00104714
	FGR	1.30196	1.55e-05
	MGC11266	1.30925	1.6e-05
	ADAMTS19	1.32438	9.38e-05
	SMARCE1	1.32636	0.00270294
	SYNGR3	1.33223	0.000758037
	TTC12	1.33984	6.29e-07
	XAGE2	1.34131	0.00911266
	TCF4	1.34778	0.00012507
	KIAA0367	1.35222	0.00660757
	LASS4	1.35317	0.00561707
	DNMT3B	1.35341	4.9e-08
	UGCGL1	1.35685	6.19e-05
	YES1	1.36258	0.00104901
	FAM19A2	1.3707	0.00176254
	DDC	1.3776	4.95e-09
	ANXA6	1.37775	0.0031046
	DMRT1	1.37869	7.75e-05
	KTI12	1.38164	1.25e-05
	USH3A	1.403	0.000175307
	LMAN2	1.40384	0.00216759
	ZNF85	1.40868	0.00673468
	ZNF273	1.41048	0.001657
	DNAJC4	1.42949	0.000564506
	TRPC5	1.43023	0.000489842
	FLJ41327	1.43094	0.00843328
	ZNF287	1.43936	0.000462321
	ACSS1	1.44287	0.0051789
	RAD52B	1.44339	0.00188507
	NSFL1C	1.47156	0.00226012
	EPB41L4B	1.47475	0.00438841
	TSN	1.47761	1.61e-07
	TNFSF4	1.48188	0.000120052
	INHBB	1.48859	0.00030582
	RDHE2	1.4892	6.05e-08
	KLHL3	1.49278	0.00178311
	DYNLRB2	1.49412	0.000256815
	STK3	1.51079	0.00756746
	PKIA	1.51178	1.08e-08
	FOXK2	1.53019	0.000236941
	PABPN1	1.53264	0.000506668
	POU4F1	1.5428	7.4e-05
	RORB	1.54955	0.000256512
	TMED1	1.55307	0.000686607
	APOBEC3B	1.55327	0.00647386
	GPR150	1.56054	0.00696846
	DDX41	1.56576	0.00463604
	HIST1H4D	1.57029	0.000713987
	POU3F2	1.57264	4.85e-06
	ANKRD41	1.57913	0.00670598
	KLRC1	1.58167	0.00243427
	CHST2	1.58926	0.00176329
	DMP1	1.59139	0.0028346
	GPR35	1.60627	0.00445264
	ANKRD45	1.60968	5.55e-05
	KLHDC8B	1.62009	0.00418923
	DCTN4	1.62931	1.22e-06
	PROS1	1.63589	1.35e-07
	SLC35C2	1.64513	0.000411074
	LMNA	1.64687	0.0010268
	ARMET	1.64705	0.00194283
	CHN1	1.64843	0.000195618
	KCNMB4	1.67531	1.27e-05
	SDAD1	1.6803	7.02e-09
	RBBP4	1.68606	0.00667628
	ST8SIA1	1.69457	7.79e-05
	RUFY1	1.6974	0.0086735
	FAM3C	1.70353	0.00233298
	ADAM23	1.70582	0.0028317
	AKAP1	1.71104	0.000196989
	TGM1	1.71538	6.96e-05
	BASP1	1.71738	1.83e-05
	EIF3S3	1.74313	0.000165652
	BHLHB5	1.75005	0.000358213
	FLJ22624	1.75731	0.000402206
	ZNF570	1.75919	0.00015558
	DYM	1.7624	1.27e-05
	SSTR2	1.77013	0.000247396
	MGC26856	1.77699	3.96e-08
	CD48	1.78646	0.00158907
	ZBTB25	1.78967	0.000270944
	ZNF254	1.79011	0.000428305
	ITPKB	1.79899	2.16e-05
	NRCAM	1.79983	0.00817473
	LHFP	1.8241	0.00742499
	RDX	1.83437	0.00108787
	COL9A2	1.87358	0.000411074
	GAMT	1.88195	0.000670158
	SIAH2	1.90569	9.42e-06
	FLJ10815	1.91332	0.000504104
	LOC114984	1.92697	1.53e-06
	EPM2AIP1	1.93102	0.00219853
	HNRPU	1.97748	0.000718728
	CARD11	1.98139	0.00252689
	CIDEC	1.9893	0.00214494
	ZNF480	2.00165	4.19e-05
	PCDHGC3	2.00968	0.00123146
	RNASE6	2.03435	0.000775695
	NOP5/NOP58	2.08123	0.000105512
	BOLA1	2.09216	0.000143315
	MYEF2	2.09371	0.000274262
	JAM3	2.12662	0.00306491
	PTF1A	2.13076	2e-05
	KISS1R	2.14084	0.00120047
	ADAMTS5	2.16882	3.19e-05
	CD200	2.26395	4.64e-08
	DOC1	2.27839	0.00093171
	EIF3S10	2.29271	1.08e-05
	FOXN1	2.29683	9.14e-06
	LACTB	2.3309	0.000245938
	WNT5A	2.37128	1.43e-05
	HIST1H2BB	2.42854	1.51e-05
	SARM1	2.5577	3.96e-08
	FLJ10560	2.57266	0.000872421
	CLPB	2.5887	8.59e-08
	VPREB1	2.65509	2.58e-05
	KCNQ5	2.80297	0.000481896
	AKR1C3	2.90312	5.69e-06

## Sheet: Copy number alteration
	Table S2. Multi-dimensional siganatures for gastric cancer (copy number alteration).
	Alteration	Chromosome region	Q-value	Residual q value	Wide peak boundaries	Genes in wide peak
	Deleted	16q23.1	6.8685e-72	6.8685e-72	chr16:78129058-79627770	WWOX
		4q22.1	3.783e-46	2.7616e-43	chr4:91148280-93240505	FAM190A
		5q11.2	5.4468e-39	5.4468e-39	chr5:58260298-59787985	hsa-mir-582	PDE4D	PART1
		9p23	6.9101e-36	8.4968e-32	chr9:8310705-12693402	PTPRD
		3p14.2	8.6277e-25	8.6277e-25	chr3:59034763-61547330	FHIT
		6p25.3	1.3623e-23	1.3623e-23	chr6:1608837-2252425	FOXC1	GMDS
		7q31.1	1.9089e-21	1.9089e-21	chr7:110725672-111366370	LRRN3
		20p12.1	3.3626e-19	3.3626e-19	chr20:14302876-15179819	FLRT3	MACROD2-AS1
		9p21.3	3.3802e-35	7.3467e-19	chr9:21865498-21997722	CDKN2A	C9orf53
		18q21.2	1.1094e-16	1.1094e-16	chr18:48472083-48920689	SMAD4	MEX3C	ELAC1
		6q26	3.5904e-12	3.5904e-12	chr6:161693099-163153207	PARK2
		1p36.11	2.4896e-10	2.4896e-10	chr1:26752993-27220856	hsa-mir-1976	SFN	HMGN2	RPS6KA1	ARID1A	GPN2	PIGV	DHDDS	ZDHHC18	MIR1976
		Xp21.1	1.6229e-10	1.802e-09	chrX:30870233-32661893	hsa-mir-548f-5	DMD	FTHL17
		4q34.3	1.0349e-13	5.02e-08	chr4:178911874-186321446	hsa-mir-1305	SLC25A4	CASP3	DCTD	ACSL1	ING2	IRF2	CLDN22	CDKN2AIP	ODZ3	LRP2BP	STOX2	KIAA1430	TRAPPC11	MLF1IP	WWC2	SNX25	MGC45800	ENPP6	C4orf38	RWDD4	CCDC111	ANKRD37	LOC389247	HELT	FAM92A3	SLED1	LINC00290	LOC728175	LOC731424	CLDN24	MIR1305	MIR3945	LOC100506229
		2q32.1	3.3971e-08	3.6056e-07	chr2:187373995-187560595	ITGAV
		10q23.31	2.8545e-06	2.795e-06	chr10:89313008-90034038	PTEN	PAPSS2	ATAD1	CFL1P1	KLLN
		3q26.31	4.4636e-05	4.5156e-05	chr3:173999806-175760559	NAALADL2	MIR4789
		2q37.2	3.7145e-05	9.9983e-05	chr2:235913227-237079324	GBX2	AGAP1
		16p13.3	9.3326e-05	9.9983e-05	chr16:5144019-7771745	RBFOX1
		15q15.1	0.00016819	0.00016819	chr15:37383162-55474704	hsa-mir-1266	hsa-mir-147b	hsa-mir-1282	hsa-mir-627	hsa-mir-4310	hsa-mir-626	B2M	BUB1B	CAPN3	CKMT1B	CYP19A1	DUT	EPB42	FBN1	FGF7	GABPB1	GALK2	GANC	GATM	GCHFR	PDIA3	HDC	ONECUT1	ITPKA	IVD	LTK	MAP1A	MFAP1	MYO5A	PLCB2	MAPK6	RAD51	SLC12A1	SORD	SPINT1	SRP14	THBS1	TP53BP1	TYRO3	SLC30A4	EIF3J	JMJD7-PLA2G4B	SNAP23	USP8
		Xp22.2	8.9234e-05	0.00096942	chrX:9891764-11137490	CLCN4	MID1	WWC3	LOC100288814
		11p15.4	0.0014216	0.0014057	chr11:2441018-3249828	CARS	CDKN1C	KCNQ1	NAP1L4	SLC22A18	SLC22A18AS	PHLDA2	KCNQ1OT1	KCNQ1DN	OSBPL5	C11orf36	MRGPRG	SNORA54
		11q23.2	0.0014956	0.0014956	chr11:96126036-135006516	hsa-mir-3167	hsa-mir-100	hsa-mir-4301	hsa-mir-34c	ACAT1	ACRV1	BIRC2	BIRC3	APLP2	APOA1	APOA4	APOC3	ARCN1	ATM	FXYD2	CXCR5	CASP1	CASP4	CASP5	CBL	CD3D	CD3E	CD3G	CHEK1	CRYAB	DDX6	DDX10	DLAT	DPAGT1	DRD2	ETS1	FDX1	FLI1	SLC37A4	GRIA4	GRIK4	GUCY1A2	H2AFX	HMBS	HSPA8	HSPB2	HTR3A	IL10RA	IL18
		17p12	0.0016132	0.0016164	chr17:10740609-13975082	hsa-mir-548h-3	hsa-mir-744	DNAH9	MAP2K4	ZNF18	ARHGAP44	HS3ST3A1	ELAC2	MYOCD	CDRT15P1	FLJ34690	SHISA6	MIR744
		21q11.2	0.00059004	0.0019954	chr21:1-16335988	hsa-mir-3118-5	hsa-mir-3156-3	BAGE	HSPA13	TPTE	RBM11	C21orf15	SAMSN1	BAGE5	BAGE4	BAGE3	BAGE2	ANKRD30BP2	LIPI	ABCC13	POTED	LOC388813	ANKRD20A11P	TEKT4P2	MIR3156-3	MIR3687	MIR3648
		19p13.3	0.0029128	0.0029415	chr19:807593-5455610	hsa-mir-7-3	hsa-mir-637	hsa-mir-4321	hsa-mir-1909	hsa-mir-3187	AES	AMH	ATP5D	AZU1	CIRBP	CNN2	CSNK1G2	DAPK3	CFD	ARID3A	EEF2	EFNA2	ELANE	GAMT	GNA11	GNA15	GNG7	MKNK2	GPX4	MATK	GADD45B	NFIC	OAZ1	POLR2E	MAP2K2	PRTN3	PTPRS	RPS15	SGTA	SH3GL1	STK11	TBXA2R	TCF3	THOP1	TLE2	SF3A2	S1PR4	AP3D1	APBA3
		21q22.13	0.00044682	0.0036473	chr21:38638578-38997673	DYRK1A
		17q24.3	0.0061254	0.0063794	chr17:70116519-70595192	SOX9	LOC100499467
		9q21.11	0.0061702	0.0084298	chr9:38619152-71322791	hsa-mir-1299	PGM5	ZNF658	FAM75A7	CNTNAP3	ANKRD20A1	FAM201A	C9orf71	CBWD5	LOC286297	FOXD4L3	FOXD4L4	AQP7P1	KGFLP1	FAM75A6	MGC21881	FAM74A1	FAM74A4	ZNF658B	LOC440896	ANKRD20A3	ANKRD20A2	AQP7P3	LOC442421	CBWD3	FAM27A	LOC572558	PGM5P2	LOC642236	FAM75A2	FAM75A4	LOC642929	LOC643648	CBWD6	FAM75A1	FAM74A2	FOXD4L6	FOXD4L5	LOC653501	KGFLP2	FAM75A3	FAM75A5	FAM74A3	CNTNAP3B
		14q32.33	0.0088759	0.0089932	chr14:80328133-107349540	hsa-mir-203	hsa-mir-4309	hsa-mir-1247	hsa-mir-656	hsa-mir-370	hsa-mir-345	hsa-mir-342	hsa-mir-3173	SERPINA3	AKT1	BDKRB1	BDKRB2	CALM1	SERPINA6	FOXN3	CHGA	CKB	CRIP1	CRIP2	DIO2	DIO3	DYNC1H1	EIF5	ELK2AP	EML1	GALC	GTF2A1	BRF1	HSP90AA1	IFI27	ITPK1	JAG2	KLC1	MARK3	ATXN3	NDUFB1	SERPINA5	SERPINA1	SERPINA4	PPP2R5C	LGMN	PSMC1	MOK	SEL1L
		20p12.1	3.3626e-19	1	chr20:1-63025520	hsa-mir-647	hsa-mir-4326	hsa-mir-124-3	hsa-mir-133a-2	hsa-mir-3195	hsa-mir-1257	hsa-mir-646	hsa-mir-298	hsa-mir-4325	hsa-mir-1302-5	hsa-mir-1259	hsa-mir-1289-1	hsa-mir-499	hsa-mir-644	hsa-mir-1825	hsa-mir-3193	hsa-mir-663	hsa-mir-3192	hsa-mir-103-2-as	hsa-mir-1292	hsa-mir-3194	ADA	ADRA1D	JAG1	AHCY	ASIP	ATP5E	AVP	BCL2L1	BFSP1	BMP2	BMP7	BPI	ENTPD6	CD40	CDC25B	CDH4	CEBPB	CENPB	CHGB	CHRNA4	COL9A3	CSE1L	CSNK2A1
	Amplified	17q12	6.3726e-39	6.3726e-39	chr17:37854508-37876018	ERBB2
		19q12	3.6044e-29	3.6044e-29	chr19:30287570-30358836	CCNE1
		8q24.21	2.2016e-20	2.2016e-20	chr8:128153108-128754688	MYC	POU5F1B	LOC727677
		12p12.1	7.6453e-20	7.6453e-20	chr12:25339898-25414737	KRAS	CASC1	LYRM5
		7q21.2	9.2484e-17	1.0901e-16	chr7:91785971-92571116	hsa-mir-1285-1	KRIT1	CDK6	PEX1	ANKIB1	GATAD1	RBM48	MGC16142	FAM133B	LRRD1	LOC728066
		8p23.1	6.5144e-16	6.5144e-16	chr8:11547791-11638987	GATA4	NEIL2
		11q13.3	2.6026e-11	2.6762e-11	chr11:69150824-69595013	CCND1	FGF4	FGF19	ORAOV1
		18q11.2	1.0948e-10	1.0948e-10	chr18:19594807-19766958	GATA6
		20q13.2	1.6598e-10	1.6598e-10	chr20:52148496-52556693	ZNF217	SUMO1P1
		6p21.1	1.9889e-08	1.9889e-08	chr6:43528560-43990198	POLH	VEGFA	MAD2L1BP	GTPBP2	MRPS18A	XPO5	C6orf223	RSPH9	LOC100132354
		11p13	1.5526e-07	1.6656e-07	chr11:35244045-35263023	CD44
		15q26.1	1.7388e-07	1.7388e-07	chr15:90778391-91264459	BLM	IQGAP1	GABARAPL3	NGRN	CRTC3	ZNF774	C15orf58	TTLL13
		12q15	6.5578e-07	6.5578e-07	chr12:69109618-70036889	hsa-mir-1279	CPM	LYZ	MDM2	YEATS4	CCT2	FRS2	CPSF6	SLC35E3	NUP107	LRRC10	MIR1279	MIR3913-2	MIR3913-1
		10q26.13	1.897e-06	1.897e-06	chr10:123172617-123399846	FGFR2
		1q42.3	4.4353e-08	2.9951e-06	chr1:234932633-235243263	[TOMM20]
		3q26.2	1.5794e-05	1.5794e-05	chr3:162186906-186796903	hsa-mir-1248	hsa-mir-1224	hsa-mir-569	hsa-mir-551b	hsa-mir-720	hsa-mir-1263	ACTL6A	AHSG	BCHE	AP2M1	CLCN2	CRYGS	DGKG	DVL3	ECT2	EHHADH	EIF4A2	EIF4G1	EPHB3	ETV5	MECOM	GHSR	HRG	KNG1	NDUFB5	CLDN11	SERPINI1	SERPINI2	PIK3CA	PLD1	POLR2H	PRKCI	PSMD2	RFC4	SNORA63	TRA2B	SI	ST6GAL1	SKIL	SLC2A2	SOX2	TERC	THPO	SEC62
		7p11.2	6.7573e-05	0.00010792	chr7:55035101-55424026	EGFR
		13q22.1	0.00069863	0.00069863	chr13:73642878-73921130	KLF5
		1q21.3	2.9697e-05	0.0013039	chr1:149885584-152140015	hsa-mir-554	hsa-mir-4257	ARNT	CTSK	CTSS	ECM1	ENSA	MCL1	PI4KB	PSMB4	PSMD4	RFX5	RORC	S100A10	S100A11	VPS72	TCHH	TUFT1	PIP5K1A	ANXA9	SELENBP1	PRPF3	SETDB1	SV2A	SF3B4	SEMA6C	MTMR11	MLLT11	TDRKH	CELF3	VPS45	POGZ	RPRD2	CA14	TMOD4	CERS2	APH1A	PLEKHO1	OAZ3	MRPS21	ADAMTSL4	C1orf56	GOLPH3L	FAM63A
		5p13.2	0.0013991	0.0013991	chr5:35850976-44454429	hsa-mir-1274a	hsa-mir-580	C6	C7	C9	DAB2	FGF10	FYB	GDNF	GHR	HMGCS1	IL7R	LIFR	OXCT1	PRKAA1	PTGER4	RPL37	SEPP1	SKP2	SLC1A3	ZNF131	OSMR	NUP155	PAIP1	NNT	TTC33	NIPBL	FBXO4	WDR70	CCL28	C5orf28	C5orf42	CARD6	LMBRD2	HEATR7B2	EGFLAM	NADKD1	UGT3A1	CAPSL	LOC153684	UGT3A2	NIM1	RANBP3L	RICTOR
		6q21	0.0039725	0.0039725	chr6:107098934-107221941	QRSL1	LOC100422737
[truncated: 628 more columns]
